# Supplementary material
Source: PubMed Central journal article supplement (PMC5047071)
Supplement: supp_pp.16.00183_PP2016-00183R2_Supplemental_figurestbls.pdf [file supp_pp.16.00183_PP2016-00183R2_Supplemental_figurestbls.pdf]

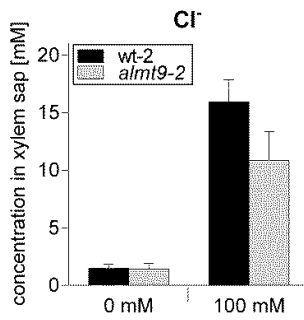

1

2 **Supplemental Figure S1.** Cl<sup>-</sup> content in xylem sap of wild-type-2 (wt-2) and *almt9-2* mutant  
 3 plants upon 24 h salt treatment. Xylem sap Cl<sup>-</sup> content was determined in hydroponically  
 4 grown plants prior to (0 mM) and after NaCl treatment (100 mM). For each biological  
 5 replicate (n = 4) xylem sap was collected and pooled from at least ten plants per genotype and  
 6 treatment. Data are presented as means ± SEM. No statistically significant differences were  
 7 detected between both genotypes by two-tailed Student's t-test (P < 0.05).

8

9

10

11

12

13

14

15

16

17

18

19

20

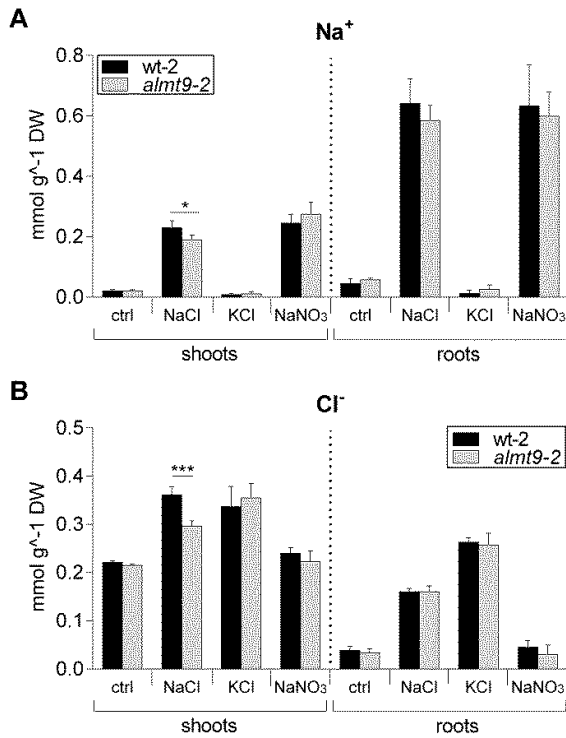

21

22 **Supplemental Figure S2.**  $\text{Na}^+$  and  $\text{Cl}^-$  contents in wild-type and *almt9* mutant plants upon  
 23 treatment with different salt compositions.  $\text{Na}^+$  (A) and  $\text{Cl}^-$  (B) content analysis in shoots  
 24 ( $n = 6$ ) and roots ( $n = 5$ ) of hydroponically grown *almt9-2* mutants and the corresponding  
 25 wild-type (wt-2) in response to 24 h treatment with control solution (ctrl), 100 mM NaCl,  
 26 100 mM KCl and 100 mM NaNO<sub>3</sub>. Data are means  $\pm$  SD. Asterisks indicate statistically  
 27 significant differences from wt-2 (\* $P < 0.05$ , \*\* $P < 0.01$ , \*\*\* $P < 0.001$ ; two-tailed Student's  
 28 t-test). DW, dry weight.

29

30

31

32

33

34

35

36

37

38

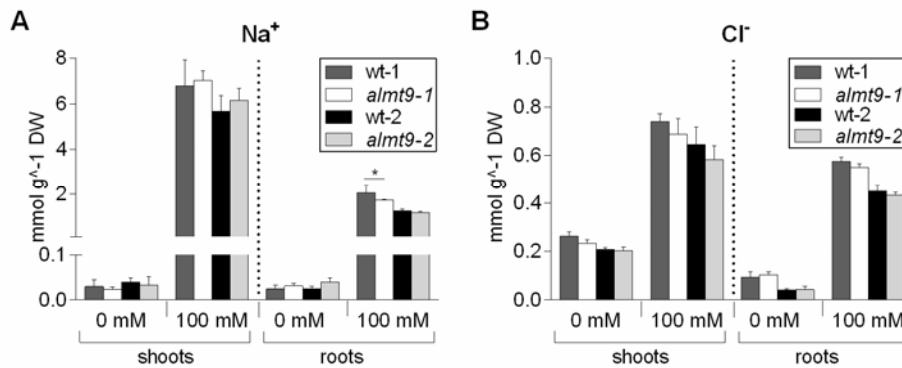

39

40 **Supplemental Figure S3.** Na<sup>+</sup> and Cl<sup>-</sup> contents in wild-type and *almt9* mutant plants upon  
 41 prolonged exposure to salinity. Na<sup>+</sup> (A) and Cl<sup>-</sup> (B) content analysis in shoots and roots of  
 42 hydroponically grown *almt9-1* and *almt9-2* knock-out mutants and the corresponding  
 43 wild-types (wt-1 and wt-2) upon seven days of treatment with control (0 mM) or NaCl  
 44 (100 mM) solutions. Data are means ± SD of n ≥ 4 biological replicates. One-way ANOVA of  
 45 each tissue and treatment and a pair-wise comparison was used for statistical analysis.  
 46 Asterisks indicate significant differences from the corresponding wt (\*P < 0.05, \*\*P < 0.01,  
 47 \*\*\*P < 0.001). DW, dry weight.

48

49

50

51

52

53

54

55

56

57

58

59

60

61

62

63

64

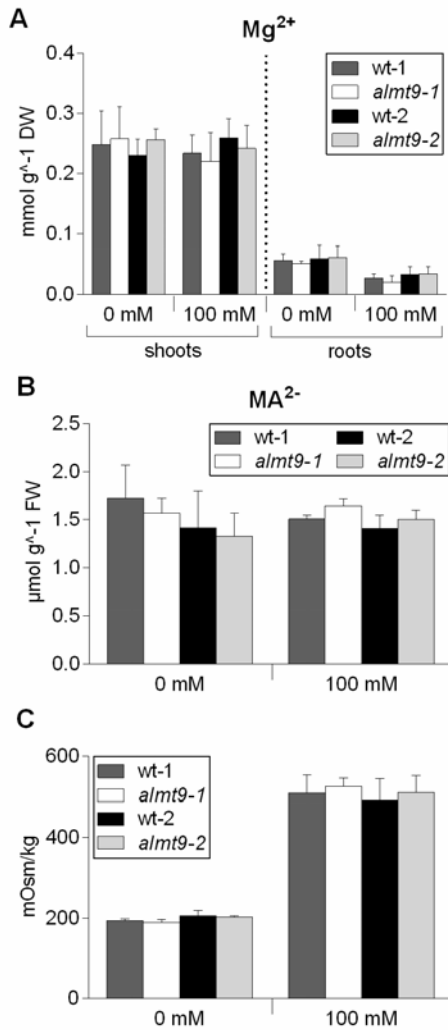

65

66 **Supplemental Figure S4.**  $Mg^{2+}$ ,  $MA^{2-}$  and osmotic contents in wild-type and *almt9* mutants  
 67 during 24 h salt stress.  $Mg^{2+}$  (A;  $n \geq 5$ ),  $MA^{2-}$  (B;  $n \geq 4$ ), and osmotic (C;  $n \geq 4$ ) contents  
 68 were determined in shoots (and roots [A]) of hydroponically grown *almt9-1* and *almt9-2*  
 69 mutants and the corresponding wild-types (wt-1 and wt-2) upon 24 h treatment with control (0  
 70 mM) or NaCl (100 mM) solutions. Data are means  $\pm$  SD. No statistically significant  
 71 differences were detected using one-way ANOVA of each tissue and treatment and a pair-  
 72 wise comparison ( $P < 0.05$ ). DW, dry weight; FW, fresh weight.

73

74

75

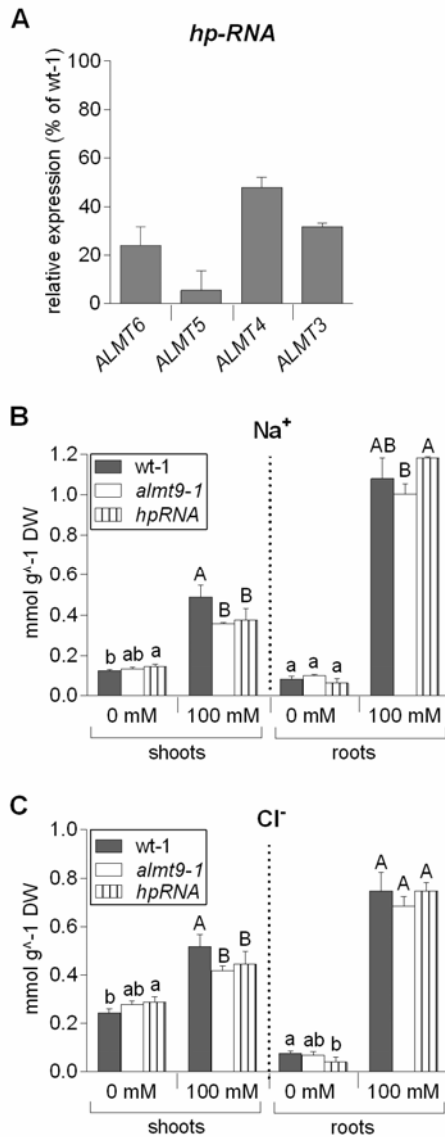

76

77 **Supplemental Figure S5.** Evaluation of the transgenic hairpin-RNA-expressing line that  
 78 targets clade II ALMTs for multiple transcriptional down-regulation (*hpRNA*). A, qRT-PCR  
 79 analysis of the ALMT clade II members *ALMT6*, *ALMT5*, *ALMT4* and *ALMT3*. Transcript  
 80 abundance was compared between wild-type-1 (wt-1) and *hpRNA* (*almt9-1* knock-out  
 81 background). The data was normalized to expression levels of the target genes in wt-1. *ACT2*  
 82 served as a reference gene. The SD was calculated from two biological replicates. B and C,  
 83 Ion content analysis of  $\text{Na}^+$  (B) and  $\text{Cl}^-$  (C) in shoots and roots of hydroponically grown wt-1,  
 84 *almt9-1* and *hpRNA* upon 24 h treatment with control (0 mM) or NaCl (100 mM) solutions.  
 85 Data are means  $\pm$  SD of n = 4 biological replicates. One-way ANOVA of each tissue and  
 86 treatment and a Tukey-Kramer multiple comparison post-test was used for statistical analysis.

87 Different lowercase letters indicate significant differences in ion content ( $P < 0.05$ ) under  
88 control conditions, capital letters under salinity. DW, dry weight.

89

90

91

92

93

94

95

96

97

98

99

100

101

102

103

104

105

106

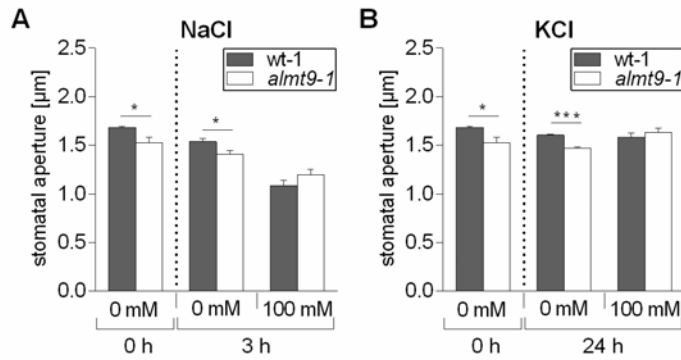

107

108 **Supplemental Figure S6.** Stomatal movement in wild-type and *almt9* plants during NaCl and  
 109 KCl stress. *In situ* assay of native stomatal apertures (see Material and Methods) using  
 110 hydroponically grown wild-type-1 (wt-1) and *almt9-1* plants. Roots were exposed to control  
 111 (0 mM) or stress solutions, and the stomatal aperture was measured before (0 h) and after  
 112 treatment. A, Stomatal movement in response to 100 mM NaCl (100 mM) for 3 h. The  
 113 measurement was conducted in parallel with the 24 h salinity treatment. Hence, the apertures  
 114 before treatment are also shown in Fig. 5A. B, Stomatal movement in response to 100 mM  
 115 KCl (100 mM) for 24 h. The measurement was conducted in parallel with the 24 h salinity  
 116 treatment. Data of control conditions are also shown in Fig. 5A. The SEM was calculated  
 117 from averages of  $n \geq 4$  biological replicates. Asterisks indicate statistically significant  
 118 differences from wt-1 (\* $P < 0.05$ , \*\* $P < 0.01$ , \*\*\* $P < 0.001$ ; two-tailed Student's t-test).

119

120

121

122

123

124

125

126

127

128

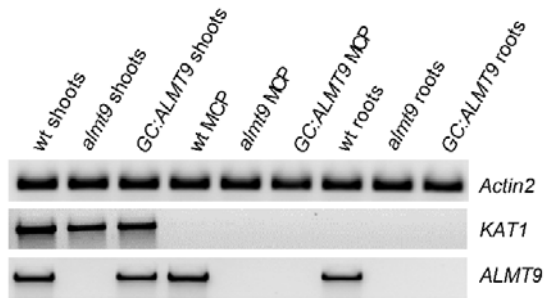

129

130 **Supplemental Figure S7.** Evaluation of the guard cell-specific complementation line  
 131 (*GC:ALMT9*) of *almt9-2* by PCR. For PCR amplification of *ACT2*, the guard cell-specific  
 132 *KAT1* and *ALMT9* cDNA from wild-type-2 (wt), *almt9-2* and *GC:ALMT9* was used. cDNA  
 133 was synthesized from mRNA extracted from either shoots, mesophyll cell protoplasts (MCP),  
 134 or roots.

135

136

137

138

139

140

141



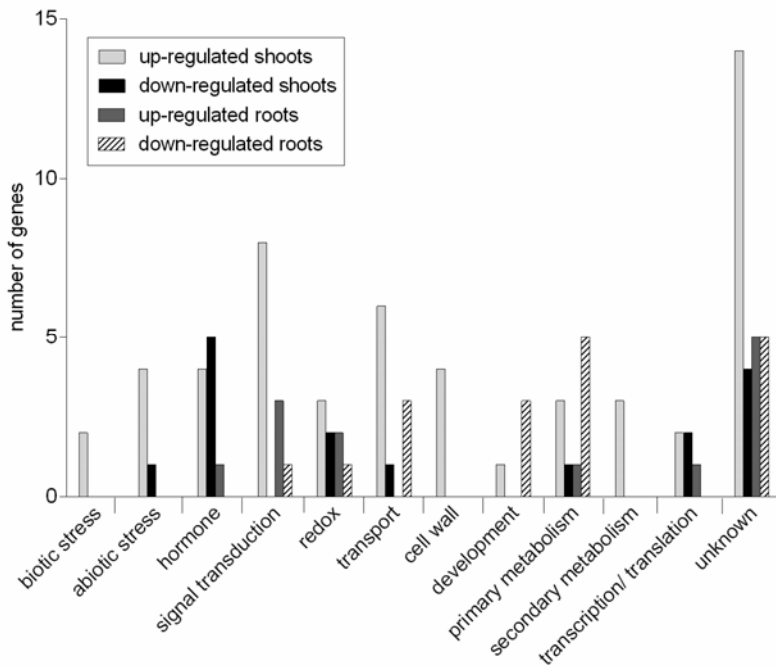

142

143 **Supplemental Figure S8.** Biological functions of genes that are differentially expressed in  
 144 *almt9-1* exclusively under salinity. Genes that show a differential expression exclusively  
 145 under salinity conditions (24 h, 100 mM NaCl) in *almt9-1* shoots and roots (for selection  
 146 requirements see Material and Methods section) were arranged in selected functional  
 147 categories. Up-regulated, genes with higher expression in *almt9-1* compared to wild-type-1;  
 148 down-regulated, genes with lower expression in *almt9-1*.

149

150

151

152

153

154

155

156

157

158

159

160

161

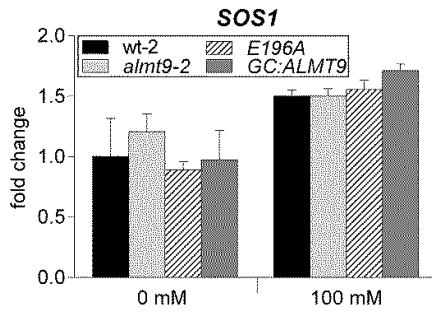

162

163 **Supplemental Figure S9.** Expression analysis of *SOS1* upon 24 h salt treatment. Expression  
 164 of *SOS1* was determined in roots of wild-type-2 (wt-2), *almt9-2*, and the complemented lines  
 165 *E196A* and *GC:ALMT9* upon exposure to control (0 mM) or NaCl (100 mM) conditions for  
 166 24 h by qRT-PCR. Each data point was derived from n = 3 biological replicates and is shown  
 167 as mean ± SD. The data were normalized to the expression level of *SOS1* in wt-2 under  
 168 control conditions. *ACT2* served as a reference gene. No statistically significant differences  
 169 were detected using one-way ANOVA and Tukey-Kramer multiple comparison post-test for  
 170 each treatment ( $P < 0.05$ ).

171

172

173

**Supplemental Table S1.** Ion contents of wild-type and *almt9* mutant plants upon 24 h salinity.

| Ion                          | NaCl<br>[mM] | Tissue | Mean $\pm$ SD <sup>a</sup> |                      |                   |                    |
|------------------------------|--------------|--------|----------------------------|----------------------|-------------------|--------------------|
|                              |              |        | wild-type-1                | <i>almt9-1</i>       | wild-type-2       | <i>almt9-2</i>     |
| Na <sup>+</sup>              | 0            | Shoots | 0.023 $\pm$ 0.005          | 0.018 $\pm$ 0.005    | 0.062 $\pm$ 0.009 | 0.059 $\pm$ 0.005  |
|                              | 100          | Shoots | 0.455 $\pm$ 0.053          | 0.366 $\pm$ 0.028**  | 0.355 $\pm$ 0.012 | 0.273 $\pm$ 0.035* |
|                              | 0            | Roots  | 0.033 $\pm$ 0.009          | 0.041 $\pm$ 0.012    | 0.045 $\pm$ 0.014 | 0.048 $\pm$ 0.015  |
|                              | 100          | Roots  | 0.853 $\pm$ 0.098          | 0.804 $\pm$ 0.168    | 0.845 $\pm$ 0.150 | 0.763 $\pm$ 0.178  |
| Cl <sup>-</sup>              | 0            | Shoots | 0.221 $\pm$ 0.032          | 0.263 $\pm$ 0.027*   | 0.204 $\pm$ 0.122 | 0.209 $\pm$ 0.013  |
|                              | 100          | Shoots | 0.547 $\pm$ 0.064          | 0.406 $\pm$ 0.023*** | 0.534 $\pm$ 0.035 | 0.451 $\pm$ 0.017* |
|                              | 0            | Roots  | 0.077 $\pm$ 0.026          | 0.075 $\pm$ 0.028    | 0.082 $\pm$ 0.011 | 0.085 $\pm$ 0.034  |
|                              | 100          | Roots  | 0.749 $\pm$ 0.067          | 0.737 $\pm$ 0.079    | 0.763 $\pm$ 0.143 | 0.733 $\pm$ 0.083  |
| K <sup>+</sup>               | 0            | Shoots | 1.295 $\pm$ 0.123          | 1.393 $\pm$ 0.083    | 1.207 $\pm$ 0.052 | 1.287 $\pm$ 0.084  |
|                              | 100          | Shoots | 1.200 $\pm$ 0.058          | 1.186 $\pm$ 0.069    | 1.238 $\pm$ 0.038 | 1.256 $\pm$ 0.081  |
|                              | 0            | Roots  | 0.947 $\pm$ 0.049          | 0.996 $\pm$ 0.085    | 1.052 $\pm$ 0.217 | 1.029 $\pm$ 0.310  |
|                              | 100          | Roots  | 0.668 $\pm$ 0.188          | 0.648 $\pm$ 0.124    | 0.740 $\pm$ 0.132 | 0.569 $\pm$ 0.099  |
| NO <sub>3</sub> <sup>-</sup> | 0            | Shoots | 0.163 $\pm$ 0.007          | 0.157 $\pm$ 0.012    | 0.168 $\pm$ 0.021 | 0.166 $\pm$ 0.028  |
|                              | 100          | Shoots | 0.160 $\pm$ 0.013          | 0.156 $\pm$ 0.016    | 0.162 $\pm$ 0.015 | 0.170 $\pm$ 0.011  |
|                              | 0            | Roots  | 0.060 $\pm$ 0.004          | 0.060 $\pm$ 0.002    | 0.054 $\pm$ 0.003 | 0.055 $\pm$ 0.001  |
|                              | 100          | Roots  | 0.055 $\pm$ 0.006          | 0.055 $\pm$ 0.006    | 0.057 $\pm$ 0.004 | 0.055 $\pm$ 0.002  |

<sup>a</sup> Concentrations are shown in [mmol/ g dry weight] for Na<sup>+</sup>, Cl<sup>-</sup>, and K<sup>+</sup>. Concentrations are shown in [mmol/ g fresh weight] for NO<sub>3</sub><sup>-</sup>. The results are illustrated in Fig. 2. Data of n  $\geq$  5 biological replicates derived from two independent experiments are shown. One-way ANOVA of each tissue and treatment and a pair-wise comparison was used for statistical analysis. Asterisks indicate significant differences from the corresponding wild-type (\*P < 0.05, \*\*P < 0.01, \*\*\*P < 0.001).

**Supplemental Table S2.** List of differentially expressed genes between wild-type-1 and

*almt9-1* in shoots exclusively under salinity.

| Gene ID          | Description/ Name                                                        | Log <sub>2</sub> Ratio | p-value          |
|------------------|--------------------------------------------------------------------------|------------------------|------------------|
| AT2G18190        | P-loop containing nucleoside triphosphate hydrolases superfamily protein | 4.674                  | 1.58E-05         |
| AT3G26830        | Cytochrome P450 enzyme (CYP71B15/ PAD3)                                  | 4.411                  | 1.32E-05         |
| <b>AT2G04040</b> | <b>MATE-related detoxification efflux carrier (DTX1)</b>                 | <b>3.998</b>           | <b>4.70E-05</b>  |
| AT1G29715        | Pseudogene                                                               | 3.98                   | 5.93E-05         |
| AT1G66390        | MYB DOMAIN PROTEIN 90 (MYB90/ PAP2)                                      | 3.74                   | 0.003046         |
| AT1G26380        | FAD-binding Berberine family protein                                     | 3.478                  | 7.06E-05         |
| AT4G27140        | Seed storage albumin (SESA1)                                             | -3.441                 | 0.001111         |
| AT3G28580        | P-loop containing nucleoside triphosphate hydrolases superfamily protein | 3.371                  | 0.0002297        |
| <b>AT1G05680</b> | <b>Uridine diphosphate glycosyltransferase (UGT74E2)</b>                 | <b>3.338</b>           | <b>2.90E-07</b>  |
| AT1G13520        | Protein of unknown function (DUF1262)                                    | 3.313                  | 0.0007433        |
| AT3G44300        | Nitrilase (NIT2)                                                         | 3.217                  | 3.46E-05         |
| <b>AT2G04070</b> | <b>Putative MATE-related efflux carrier</b>                              | <b>3.05</b>            | <b>0.001947</b>  |
| AT1G62440        | LEUCINE-RICH REPEAT/EXTENSIN 2 (LRX2)                                    | 2.792                  | 7.26E-07         |
| AT5G19100        | Eukaryotic aspartyl protease family protein                              | -2.774                 | 0.002622         |
| AT5G01550        | Lectin receptor kinase subfamily A4 (LecRKA4.2)                          | 2.724                  | 0.001441         |
| AT4G04540        | Cysteine-rich receptor like protein kinase (CRK39)                       | 2.675                  | 0.002616         |
| AT2G30750        | Putative cytochrome P450 (CYP71A12)                                      | 2.619                  | 0.008339         |
| AT1G17960        | Threonyl-tRNA synthetase                                                 | 2.573                  | 0.0003076        |
| <b>AT2G04050</b> | <b>Putative MATE-related efflux carrier</b>                              | <b>2.535</b>           | <b>3.38E-05</b>  |
| AT1G16420        | Metacaspase (MCP2E/ MC8)                                                 | 2.497                  | 0.001789         |
| <b>AT1G63030</b> | <b>ERF/AP2 transcription factor family (DDF2)</b>                        | <b>-2.258</b>          | <b>0.0005246</b> |
| AT2G38240        | 2-oxoglutarate (2OG) and Fe(II)-dependent oxygenase superfamily protein  | -2.247                 | 2.76E-05         |
| AT2G12930        | Gypsy-like retrotransposon family                                        | -2.199                 | 0.003696         |
| AT3G28740        | Cytochrome P450 family (CYP81D11)                                        | 2.19                   | 0.009735         |
| AT1G21240        | Wall-associated kinase (WAK3)                                            | 2.093                  | 2.62E-07         |
| AT1G49310        | Unknown protein                                                          | 2.079                  | 0.00275          |

|                  |                                                                              |               |                  |
|------------------|------------------------------------------------------------------------------|---------------|------------------|
| AT4G20000        | VQ motif-containing protein                                                  | 2.045         | 0.006998         |
| AT5G10970        | C2H2 and C2HC zinc fingers superfamily protein                               | -2.031        | 0.0006944        |
| AT2G18193        | P-loop containing nucleoside triphosphate<br>hydrolases superfamily protein  | 2.007         | 0.0001036        |
| AT5G25260        | SPFH/Band 7/PHB domain-containing membrane-<br>associated protein family     | 1.957         | 0.001054         |
| AT1G17170        | Glutathione transferase (GSTU24)                                             | 1.956         | 0.0002155        |
| <b>AT3G63380</b> | <b>AUTO-INHIBITED CA<sup>2+</sup> ATPASE 12 (ACA12)</b>                      | <b>1.865</b>  | <b>0.004314</b>  |
| <b>AT2G31910</b> | <b>Putative Na<sup>+</sup>/H<sup>+</sup> antiporter family (CHX21)</b>       | <b>-1.848</b> | <b>0.004987</b>  |
| AT3G13950        | Unknown protein                                                              | 1.803         | 0.002431         |
| AT3G29250        | NAD(P)-binding Rossmann-fold superfamily<br>protein (SDR4)                   | 1.764         | 0.002492         |
| <b>AT1G12610</b> | <b>ERF/AP2 transcription factor family (DDF1)</b>                            | <b>-1.717</b> | <b>1.28E-08</b>  |
| <b>AT3G09640</b> | <b>Cytosolic ascorbate peroxidase (APX2/ APX1B)</b>                          | <b>-1.669</b> | <b>0.0004518</b> |
| AT5G51440        | HSP20-like chaperones superfamily protein                                    | 1.664         | 0.007465         |
| <b>AT2G47000</b> | <b>Subfamily B ABC-type auxin efflux transporter<br/>(ABCB4/ MDR4/ PGP4)</b> | <b>1.636</b>  | <b>0.001916</b>  |
| AT1G43910        | P-loop containing nucleoside triphosphate<br>hydrolases superfamily protein  | 1.597         | 0.005181         |
| AT3G25010        | Receptor like protein (RLP41)                                                | 1.593         | 1.29E-06         |
| AT4G04490        | Cysteine-rich receptor like protein kinase (CRK36)                           | 1.583         | 0.001103         |
| AT1G61810        | Beta-glucosidase (BGLU45)                                                    | 1.58          | 0.003976         |
| AT2G29350        | Senescence-associated gene (SAG13)                                           | 1.564         | 1.40E-07         |
| AT3G57240        | Glycosyl hydrolase family 17 (BG3)                                           | 1.514         | 5.12E-05         |
| AT4G12410        | SAUR-like auxin-responsive protein family<br>(SAUR35)                        | -1.49         | 0.002346         |
| AT4G25000        | ALPHA-AMYLASE-LIKE (AMY1)                                                    | 1.482         | 3.40E-05         |
| AT5G60250        | Zinc finger (C3HC4-type RING finger) family<br>protein                       | 1.473         | 0.0005328        |
| AT1G57630        | Toll-Interleukin-Resistance (TIR) domain family<br>protein                   | 1.464         | 0.00685          |
| AT4G34410        | ERF/AP2 transcription factor family (ERF109)                                 | -1.458        | 2.87E-12         |
| AT2G29460        | Glutathione transferase (GSTU4)                                              | 1.415         | 0.007186         |

|           |                                                                         |        |           |
|-----------|-------------------------------------------------------------------------|--------|-----------|
| AT3G10320 | Glycosyltransferase family 61 protein (MUCI21)                          | 1.397  | 0.006958  |
| AT5G52020 | ERF/AP2 transcription factor family                                     | -1.396 | 8.35E-06  |
| AT1G53540 | HSP20-like chaperones superfamily protein                               | -1.386 | 0.002712  |
| AT1G76930 | Extensin (EXT1/EXT4)                                                    | 1.38   | 0.0007415 |
| AT4G00700 | C2 calcium/lipid-binding plant phosphoribosyltransferase family protein | 1.378  | 0.004223  |
| AT4G24000 | Cellulose synthase (CSLG2)                                              | 1.324  | 0.002603  |
| AT5G02490 | Heat shock protein 70 (Hsp 70) family protein (HSP70-2)                 | 1.285  | 9.44E-05  |
| AT4G23140 | Cysteine-rich receptor like protein kinase (CRK6)                       | 1.229  | 8.88E-17  |
| AT4G37370 | Cytochrome P450 family (CYP81D8)                                        | 1.198  | 0.006318  |
| AT5G18270 | NAC domain containing protein (ANAC087)                                 | 1.184  | 0.002222  |
| AT3G57765 | Small nuclear RNA (U2.3)                                                | -1.149 | 0.00242   |
| AT1G14780 | MAC/Perforin domain-containing protein                                  | 1.125  | 8.42E-05  |
| AT1G15405 | Unknown gene                                                            | -1.12  | 0.009702  |
| AT4G27654 | Unknown protein                                                         | -1.117 | 2.97E-08  |
| AT3G28890 | Receptor like protein (RLP43)                                           | 1.085  | 0.0001529 |
| AT2G29110 | Ligand-gated ion channel subunit family (GLR2.8)                        | 1.065  | 0.007163  |
| AT2G03760 | Brassinosteroid sulphotransferase (SOT12/ ST1)                          | 1.031  | 0.0008528 |
| AT1G58225 | Unknown protein                                                         | 1.015  | 0.0008908 |
| AT1G35230 | Arabinogalactan protein (AGP5)                                          | 1.001  | 0.0007468 |

List of genes that are exclusively significantly up- or down-regulated under salinity conditions (24 h, 100 mM NaCl) in *almt9-1* shoots (for selection requirements see Material and Methods section). Positive  $\log_2$  ratios correspond to transcriptional up-regulation in *almt9-1*, negative  $\log_2$  ratios to transcriptional down-regulation. Names and descriptions are according to TAIR. Genes mentioned in the study are highlighted.

174

175

176

177

---

**Supplemental Table S3.** List of differentially expressed genes between wild-type-1 and

---

*almt9-1* in roots exclusively under salinity.

| Gene ID          | Description/ Name                                                       | Log <sub>2</sub><br>Ratio | p-value          |
|------------------|-------------------------------------------------------------------------|---------------------------|------------------|
| AT4G04223        | Unknown gene                                                            | -3.337                    | 6.03E-22         |
| AT5G24140        | Squalene monooxygenase (SQP2)                                           | -2.981                    | 0.0003986        |
| AT5G02330        | Cysteine/Histidine-rich C1 domain family protein                        | -2.502                    | 0.0003037        |
| AT3G01015        | TPX2 (targeting protein for Xklp2) protein family                       | 2.228                     | 0.001345         |
| AT1G19415        | Copia-like retrotransposon family                                       | -2.145                    | 0.009452         |
| AT2G30766        | Unknown protein                                                         | 2.002                     | 3.22E-06         |
| AT1G51030        | Unknown protein                                                         | -1.998                    | 0.001067         |
| AT4G38590        | Putative beta-galactosidase (BGAL14)                                    | -1.95                     | 0.005079         |
| AT4G15690        | Thioredoxin superfamily protein                                         | 1.944                     | 0.0003804        |
| AT5G17040        | UDP-Glycosyltransferase superfamily protein                             | -1.794                    | 0.0023           |
| <b>AT1G71890</b> | <b>Sucrose transporter (SUC5)</b>                                       | <b>-1.778</b>             | <b>0.005836</b>  |
| AT4G23320        | Cysteine-rich receptor like protein kinase (CRK24)                      | 1.777                     | 0.003051         |
| AT5G03310        | SAUR-like auxin-responsive protein family<br>(SAUR44)                   | 1.624                     | 0.003661         |
| AT5G11410        | Protein kinase superfamily protein                                      | 1.545                     | 0.006612         |
| AT4G23210        | Cysteine-rich receptor like protein kinase (CRK13)                      | -1.531                    | 0.0003196        |
| AT1G14345        | NAD(P)-linked oxidoreductase superfamily protein                        | -1.5                      | 0.003167         |
| AT5G27220        | Frigida-like protein                                                    | 1.484                     | 0.009174         |
| <b>AT1G73220</b> | <b>Organic cation/carnitine transporter (OCT1)</b>                      | <b>-1.483</b>             | <b>0.0001871</b> |
| AT3G53040        | Putative late embryogenesis abundant (LEA) protein                      | -1.477                    | 0.003184         |
| AT2G48121        | Unknown protein                                                         | 1.459                     | 0.009511         |
| AT1G33320        | Pyridoxal phosphate (PLP)-dependent transferases<br>superfamily protein | -1.441                    | 0.0002151        |
| AT2G03710        | SEPALLATA 4 (SEP4/ AGL3)                                                | -1.224                    | 0.0006572        |
| AT1G02250        | NAC family of transcription factors (ANAC005)                           | 1.15                      | 0.003483         |
| AT3G22560        | Acyl-CoA N-acyltransferases (NAT) superfamily<br>protein                | -1.146                    | 0.00112          |
| AT3G60090        | VQ motif-containing protein                                             | -1.129                    | 0.001143         |
| AT2G39510        | Nodulin MtN21-like transporter family protein<br>(UMAMIT14)             | -1.112                    | 0.003848         |

|           |                                                       |        |           |
|-----------|-------------------------------------------------------|--------|-----------|
| AT2G02061 | Nucleotide-diphospho-sugar transferase family protein | 1.069  | 0.00585   |
| AT4G15360 | Cytochrome P450 family (CYP705A3)                     | 1.031  | 0.0006057 |
| AT1G25150 | F-box family protein                                  | 1.028  | 0.002636  |
| AT4G17660 | Protein kinase superfamily protein                    | 1.019  | 0.00087   |
| AT5G44565 | Unknown protein                                       | -1.019 | 0.001466  |

---

List of genes that are exclusively significantly up- or down-regulated under salinity conditions (24 h, 100 mM NaCl) in *almt9-1* roots (for selection requirements see Material and Methods section). Positive  $\log_2$  ratios correspond to transcriptional up-regulation in *almt9-1*, negative  $\log_2$  ratios to transcriptional down-regulation. Names and descriptions are according to TAIR. Genes mentioned in the study are highlighted.

---

178  
179  
180  
181  
182  
183  
184  
185  
186  
187  
188  
189  
190  
191  
192  
193  
194  
195  
196  
197  
198

---

**Supplemental Table S4.** Primers used in that study.

---



| Primer Description                                | 5' - 3' Sequence                                        |
|---------------------------------------------------|---------------------------------------------------------|
| qPCR-ACT2-for                                     | TGGAATCCACGAGACAACCTA                                   |
| qPCR-ACT2-rev                                     | TTCTGTGAACGATTCCTGGAC                                   |
| qPCR-SOS1-for                                     | CTCTTCGTCGGAATGTCTCTG                                   |
| qPCR-SOS1-rev                                     | ACGAATTCCATGGCCGATCTTT                                  |
| qPCR-ALMT9-for                                    | ACCTAATCCGGATCTTAGTCGATACT                              |
| qPCR-ALMT9-rev                                    | TCACCGAATAAAGTGGAAAGCTCAG                               |
| qPCR-ALMT6-for                                    | CCGTTGCATGATGCTAGTAAATAC                                |
| qPCR-ALMT6-rev                                    | TGATGATGGTTTGCTCGAAA                                    |
| qPCR-ALMT5-for                                    | GAGCCGCTTCAAGATGCTAGTA                                  |
| qPCR-ALMT5-rev                                    | ATGACTTCTTCAAACCTCTCCTGCT                               |
| qPCR-ALMT4-for                                    | TGACGCTAGCAAGTATGCTGTT                                  |
| qPCR-ALMT4-rev                                    | CTTCAAATTCTCCAGCTGAAACAGA                               |
| qPCR-ALMT3-for                                    | GGCTTATCCTACAGAGCAGAGGCT                                |
| qPCR-ALMT3-rev                                    | TCAGAGCCAAACCCATCTTC                                    |
| qPCR-HKT1;1-for                                   | TGGTTGGATCGTTGTTTCAA                                    |
| qPCR-HKT1;1-rev                                   | CGGAATCATCATCTCCTCCT                                    |
| qPCR-CHX21-for                                    | ACGCAACTGTCTGTCTGCTAA                                   |
| qPCR-CHX21-rev                                    | CGAGAGCTAAGTTTGCGAATG                                   |
| qPCR-DTX1-for                                     | CCAATACGGAATCCCATCAG                                    |
| qPCR-DTX1-rev                                     | ATTCCCAGCTCCCAAATTGT                                    |
| hpRNA-for                                         | GATCGGATCCCTCGAGGAATACGAGAGAATACCG<br>TCG               |
| hpRNA-rev                                         | GATCATCGATGGTACCCAGCTTTCTGAGTTGACA<br>AGAAG             |
| ALMT9 <sub>pro</sub> :ALMT9 <sub>E196A</sub> -for | TAGTTGGAATGGGTTTCGAAAAATTACAATTGTTT<br>CCTCT            |
| ALMT9 <sub>pro</sub> :ALMT9 <sub>E196A</sub> -rev | TTATGGAGTTGGGTTTCGAACCATCCCAAACACC<br>TACGA             |
| SDM <sub>E196A</sub> -for                         | GATGAAAGCTTATGCATACGGGTTCCGGG                           |
| SDM <sub>E196A</sub> -rev                         | CCCGGAACCCGTATGCATAAGCTTTCATC                           |
| ALMT9 <sub>pro</sub> -for                         | GGGGACAAGTTTGTACAAAAAAGCAGGCTTAAA<br>ATTACAATTGTTTCCTCT |
| ALMT9 <sub>pro</sub> -rev                         | GGGGACCACTTTGTACAAGAAAGCTGGGTGTACT                      |

|                          |                              |
|--------------------------|------------------------------|
|                          | AGACGGATTCTCAAAG             |
| ALMT9 <sub>GC</sub> -for | GGCGCGCCATGGCGGCGAAGCAAGGTTC |
| ALMT9 <sub>GC</sub> -rev | GACTAGTCTTACATCCCAAAACACCTAC |
| KAT1-for                 | ATGTCGATCTCTTGGACTCG         |
| KAT1-rev                 | ATTTGATGAAAAATACAAATGATCACC  |

---

199  
200  
201  
202  
203  
204  
205  
206  
207  
208
