# Supplementary material
Source: PubMed Central journal article supplement (PMC5047071)
Supplement: supp_pp.16.00183_PP2016-00183R2_Supplemental_Materialdata3.pdf [file supp_pp.16.00183_PP2016-00183R2_Supplemental_Materialdata3.pdf]

**Supplemental Data Set S3.** List of differentially expressed genes between wild-type-1 and almt9-1 in shoots under salinity conditions.

| Gene ID   | Short description                                              | Curator summary                                                                                                                                                                                                                                                                                                                                                                                                                                                                                                                                                                                                                                                                                        | log2   | Rat      | pValue   | fdr   | WT-S1 | [WT-S2 | [WT-S3 | [WTplus | WTplus | WTplus | WTplus | KO-S1 | [r    | KO-S2 | [r    | KO-S3  | [r     | KOplus | KOplus | KOplus | WT-S1  | [WT-S2 | [WT-S3 | [WTplus | WTplus | WTplus | WTplus | KO-S1  | [F | KO-S2 | [F | KO-S3 | [F | KOplus | KOplus | KOplus | [FPKM |
|-----------|----------------------------------------------------------------|--------------------------------------------------------------------------------------------------------------------------------------------------------------------------------------------------------------------------------------------------------------------------------------------------------------------------------------------------------------------------------------------------------------------------------------------------------------------------------------------------------------------------------------------------------------------------------------------------------------------------------------------------------------------------------------------------------|--------|----------|----------|-------|-------|--------|--------|---------|--------|--------|--------|-------|-------|-------|-------|--------|--------|--------|--------|--------|--------|--------|--------|---------|--------|--------|--------|--------|----|-------|----|-------|----|--------|--------|--------|-------|
| AT2G11410 | transposable element gene                                      |                                                                                                                                                                                                                                                                                                                                                                                                                                                                                                                                                                                                                                                                                                        | -7,79  | 4,33E-93 | 8,26E-89 | 415,3 | 331,9 | 471,6  | 293,3  | 360,9   | 308,3  | 0      | 0      | 0     | 0     | 0     | 0     | 0      | 0      | 4,186  | 6,457  | 5,249  | 7,099  | 4,029  | 5,434  | 4,568   | 0      | 0      | 0      | 0      | 0  | 0     | 0  | 0     | 0  | 0      | 0      | 0,0659 |       |
| AT4G08093 |                                                                | pseudogene_of_unknown_protein                                                                                                                                                                                                                                                                                                                                                                                                                                                                                                                                                                                                                                                                          | -7,016 | 2,12E-40 | 2,02E-36 | 231,3 | 142,9 | 183    | 101,1  | 143     | 151,6  | 0      | 0      | 0     | 2,254 | 1,343 | 1,175 | 0      | 9,824  | 6,173  | 7,524  | 3,792  | 5,883  | 6,134  | 0      | 0       | 0      | 0,0937 | 0,0534 | 0,0475 | 0  | 0     | 0  | 0     | 0  | 0      | 0,0659 |        |       |
| AT3G18440 | aluminum-activated malate transporter 9                        | Belongs_to_the_aluminum-activated_malate_transporter_family_Encodes_a_vacuolar_malate_channel_Expressed_in_all_parts_of_plants_Almost_exclusively_expressed_in_mesophyll_cells_of_leaves.                                                                                                                                                                                                                                                                                                                                                                                                                                                                                                              | -1,195 | 1,28E-17 | 8,13E-14 | 457,2 | 539,3 | 543,7  | 465,7  | 441,2   | 484    | 215,3  | 169,6  | 182,5 | 221,5 | 184,5 | 196,8 | 14,13  | 16,95  | 16,26  | 12,72  | 13,21  | 14,25  | 6,612  | 5,028  | 5,522   | 6,409  | 5,43   | 6,157  |        |    |       |    |       |    |        |        |        |       |
| AT4G23140 | cysteine-rich RLK (RECEPTOR-like protein kinase) 6             | Arabidopsis_thaliana_receptor-like_protein_kinase_Naming_convention_from_Chen_et_al_2003_IP MID_14756307                                                                                                                                                                                                                                                                                                                                                                                                                                                                                                                                                                                               | 1,229  | 8,88E-17 | 4,23E-13 | 834,7 | 936,8 | 371,3  | 223,6  | 218,8   | 246,1  | 1004   | 300,7  | 530,9 | 618,8 | 513,9 | 462,8 | 23,34  | 26,64  | 10,05  | 5,523  | 5,924  | 6,556  | 27,9   | 8,066  | 14,53   | 16,2   | 13,68  | 13,11  |        |    |       |    |       |    |        |        |        |       |
| AT1G75230 | DNA glycosylase superfamily protein                            |                                                                                                                                                                                                                                                                                                                                                                                                                                                                                                                                                                                                                                                                                                        | -1,134 | 1,19E-12 | 4,55E-09 | 272   | 300,4 | 284,8  | 582    | 751,5   | 523,7  | 287,1  | 125,8  | 167,9 | 316,9 | 259,7 | 266,5 | 11,25  | 12,64  | 11,4   | 21,27  | 30,1   | 20,64  | 11,8   | 4,991  | 6,798   | 12,27  | 10,23  | 11,16  |        |    |       |    |       |    |        |        |        |       |
| AT2G11405 |                                                                |                                                                                                                                                                                                                                                                                                                                                                                                                                                                                                                                                                                                                                                                                                        | -7,388 | 2,41E-12 | 7,67E-09 | 25,5  | 29,2  | 29,24  | 25,1   | 19,8    | 25,84  | 0      | 0      | 0     | 0     | 0     | 0     | 4,54   | 5,288  | 5,04   | 3,949  | 3,415  | 4,383  | 0      | 0      | 0       | 0      | 0      | 0      | 0      | 0  | 0     | 0  | 0     | 0  | 0      | 0      | 0      |       |
| AT4G34410 | redox responsive transcription factor 1                        | encodes_a_member_of_the_ERF_(ethylene_response_factor)_subfamily_B_3_of_ERF/AP2_transcription_factor_family_The_protein_contains_one_AP2_domain_There_are_18_members_in_this_subfamily_including_ATERF-1_ATERF-2_AND_ATERF-5.                                                                                                                                                                                                                                                                                                                                                                                                                                                                          | -1,458 | 2,87E-12 | 7,83E-09 | 100,2 | 168,3 | 231,8  | 931,4  | 1110    | 628,7  | 173,4  | 71,54  | 172,4 | 345,1 | 236,2 | 386,5 | 4,482  | 7,657  | 10,04  | 36,81  | 48,1   | 26,8   | 7,706  | 3,07   | 7,55    | 14,45  | 10,06  | 17,51  |        |    |       |    |       |    |        |        |        |       |
| AT2G34600 | jasmonate-zim-domain protein 7                                 |                                                                                                                                                                                                                                                                                                                                                                                                                                                                                                                                                                                                                                                                                                        | -1,23  | 2,17E-11 | 4,65E-08 | 316,4 | 732,2 | 536,6  | 1554   | 2051    | 1492   | 503,6  | 126,9  | 169   | 892,9 | 524,2 | 745,1 | 28,95  | 68,16  | 47,54  | 125,7  | 181,8  | 130,1  | 45,79  | 11,14  | 15,14   | 76,5   | 45,69  | 69,06  |        |    |       |    |       |    |        |        |        |       |
| AT2G32680 | receptor like protein 23                                       |                                                                                                                                                                                                                                                                                                                                                                                                                                                                                                                                                                                                                                                                                                        | 1,073  | 2,19E-11 | 4,65E-08 | 1645  | 2072  | 1014   | 195,5  | 263     | 206,7  | 2770   | 1052   | 1816  | 404,2 | 504,2 | 478,6 | 35,81  | 45,89  | 21,37  | 3,761  | 5,545  | 4,288  | 59,91  | 21,98  | 38,71   | 8,237  | 10,45  | 10,55  |        |    |       |    |       |    |        |        |        |       |
| AT2G32150 | Haloacid dehalogenase-like hydrolase (HAD) superfamily protein |                                                                                                                                                                                                                                                                                                                                                                                                                                                                                                                                                                                                                                                                                                        | -1,332 | 4,23E-11 | 8,07E-08 | 1619  | 1955  | 2192   | 2671   | 3384    | 2058   | 1936   | 1224   | 1170  | 1423  | 940,2 | 845,6 | 90,03  | 110,6  | 118    | 131,2  | 182,3  | 109,1  | 107    | 65,32  | 63,68   | 74,11  | 49,8   | 47,63  |        |    |       |    |       |    |        |        |        |       |
| AT3G26210 | cytochrome P450, family 71, subfamily B, polypeptide 23        | putative_cytochrome_P450                                                                                                                                                                                                                                                                                                                                                                                                                                                                                                                                                                                                                                                                               | 1,137  | 1,37E-10 | 2,38E-07 | 244,7 | 301,9 | 126,2  | 108,3  | 102,3   | 91,3   | 318,1  | 234,2  | 246,8 | 230,9 | 213,9 | 221,9 | 8,693  | 10,91  | 4,339  | 3,4    | 3,521  | 3,091  | 11,23  | 7,983  | 8,582   | 7,681  | 7,237  | 7,982  |        |    |       |    |       |    |        |        |        |       |
| AT5G53750 | CBS domain-containing protein                                  |                                                                                                                                                                                                                                                                                                                                                                                                                                                                                                                                                                                                                                                                                                        | -1,158 | 2,19E-10 | 3,48E-07 | 219,2 | 537   | 562,1  | 626,9  | 644,7   | 406,5  | 699,1  | 143,1  | 148,7 | 298,1 | 230,4 | 223,3 | 9,721  | 24,23  | 24,13  | 24,56  | 27,7   | 17,18  | 30,8   | 6,088  | 6,458   | 12,38  | 9,73   | 10,03  |        |    |       |    |       |    |        |        |        |       |
| AT1G18710 | myb domain protein 47                                          | Member_of_the_R2R3_factor_gene_family.                                                                                                                                                                                                                                                                                                                                                                                                                                                                                                                                                                                                                                                                 | -1,05  | 3,21E-10 | 4,70E-07 | 461,5 | 456,4 | 633    | 540,3  | 718,5   | 611,5  | 427,4  | 175,8  | 370,6 | 288   | 238,6 | 25,55 | 25,7   | 33,93  | 26,43  | 38,53  | 32,26  | 23,51  | 11,77  | 9,528  | 19,21   | 15,18  | 13,38  |        |        |    |       |    |       |    |        |        |        |       |
| AT2G16367 |                                                                | Encodes_a_defensin-like_(DEFL)_family_protein.                                                                                                                                                                                                                                                                                                                                                                                                                                                                                                                                                                                                                                                         | -1,188 | 7,23E-10 | 9,20E-07 | 133   | 43,02 | 114,8  | 525,8  | 318     | 348    | 29,82  | 28,85  | 28,17 | 193,4 | 175,1 | 153,5 | 31,21  | 10,27  | 26,08  | 109    | 72,28  | 77,81  | 6,953  | 6,495  | 6,472   | 42,48  | 39,14  | 36,48  |        |    |       |    |       |    |        |        |        |       |
| AT1G19960 |                                                                |                                                                                                                                                                                                                                                                                                                                                                                                                                                                                                                                                                                                                                                                                                        | -1,063 | 8,51E-10 | 1,02E-06 | 624,2 | 209   | 474,3  | 1317   | 1090    | 768,3  | 296    | 240    | 210,7 | 561,3 | 430,2 | 523,3 | 90,99  | 30,99  | 66,94  | 169,7  | 154    | 106,7  | 42,87  | 33,57  | 30,07   | 76,6   | 59,72  | 77,25  |        |    |       |    |       |    |        |        |        |       |
| AT5G24850 | cryptochrome 3                                                 | Binds_flavin_adenine_dinucleotide_and_DNA_It_does_not_have_photolyase_activity_and_it_is_likely_to_act_as_photoreceptor_Closely_related_to_Synechocystis_cryptochrome.                                                                                                                                                                                                                                                                                                                                                                                                                                                                                                                                 | 2,51   | 2,90E-09 | 3,26E-06 | 9,715 | 6,146 | 2,707  | 10,57  | 8,802   | 3,445  | 28,71  | 28,85  | 38,31 | 53,71 | 44,66 | 44,65 | 0,3364 | 0,2165 | 0,0908 | 0,3234 | 0,2953 | 0,1137 | 0,988  | 0,9584 | 1,299   | 1,741  | 1,473  | 1,566  |        |    |       |    |       |    |        |        |        |       |
| AT1G70700 | TIFY domain/Divergent CCT motif family protein                 | JAZ9_is_a_protein_presumed_to_be_involved_in_jasmonate_signaling_JAZ9_transcript_levels_rise_in_response_to_a_jasmonate_stimulus_JAZ9_can_interact_with_the_COI1_F-box_subunit_of_an_SCF_E3_ubiquitin_ligase_in_a_yeast-two-hybrid_assay_only_in_the_presence_of_jasmonate-isoleucine_(JA-ILE)_or_coronatine_The_Jas_domain_appears_to_be_important_for_JAZ9_COI1_interactions_in_the_presence_of_coronatine_Two_positive_residues_(R205_and_R206)_in_the_Jas_domain_shown_to_be_important_for_coronatine_dependent_COI1_binding_are_not_required_for_binding_ATMYC2.                                                                                                                                  | -1,071 | 4,58E-09 | 4,60E-06 | 7843  | 11900 | 11990  | 5183   | 6609    | 4608   | 10480  | 6238   | 4851  | 3265  | 2252  | 2251  | 401,3  | 619,2  | 594,1  | 234,3  | 327,5  | 224,6  | 532,9  | 306,2  | 243     | 156,4  | 109,7  | 116,6  |        |    |       |    |       |    |        |        |        |       |
| AT1G19670 | chlorophyllase 1                                               | Chlorophyllase_is_the_first_enzyme_involved_in_chlorophyll_degradation_It_catalyzes_the_hydrolysis_of_the_ester_bond_to_yield_chlorophyllide_and_phytol_ATCLH1_lacks_a_typical_signal_sequence_for_the_chloroplast_Its_expression_is_induced_rapidly_by_methyljasmonate_a_known_promoter_of_senescence_and_chlorophyll_degradation.                                                                                                                                                                                                                                                                                                                                                                    | -1,198 | 7,21E-09 | 6,88E-06 | 3632  | 5612  | 6227   | 504,7  | 553,4   | 332,5  | 3819   | 2219   | 1294  | 259,1 | 158,7 | 188,4 | 175,7  | 276,1  | 291,6  | 21,57  | 25,93  | 15,32  | 183,5  | 103    | 61,25   | 11,73  | 7,308  | 9,227  |        |    |       |    |       |    |        |        |        |       |
| AT2G27690 | cytochrome P450, family 94, subfamily C, polypeptide 1         | Encodes_a_CYP94C1_Has_highest_omega-hydroxylase_activity_with_9,10-epoxystearic_acid_while_also_metabolized_lauric_acid_(C12:0)_and_C18_unsaturated_fatty_acids_Gene_expression_is_induced_in_response_to_wounding_and_jasmonic_acid_treatment                                                                                                                                                                                                                                                                                                                                                                                                                                                         | -1,088 | 1,14E-08 | 9,85E-06 | 788,8 | 3474  | 2964   | 3062   | 4013    | 2279   | 3509   | 1184   | 929,7 | 1747  | 1242  | 1388  | 25,59  | 114,6  | 93,08  | 87,75  | 126,1  | 70,44  | 113,1  | 36,84  | 29,52   | 53,05  | 38,38  | 45,61  |        |    |       |    |       |    |        |        |        |       |
| AT1G12610 | Integrase-type DNA-binding superfamily protein                 | Encodes_a_member_of_the_DREB_subfamily_A-1_of_ERF/AP2_transcription_factor_family_(DDF1)_The_protein_contains_one_AP2_domain_There_are_six_members_in_this_subfamily_including_CBF1_CBF2_and_CBF3_Overexpression_of_this_gene_results_in_delayed_flowering_and_dwarfism_reduction_of_gibberellic_acid_biosynthesis_and_increased_tolerance_to_high_levels_of_salt_This_gene_is_expressed_in_all_tissues_examined_but_most_abundantly_expressed_in_upper_stems_Overexpression_of_this_gene_is_also_correlated_with_increased_expression_of_GA_biosynthetic_genes_and_RD29A_(a_cold_and_drought_responsive_gene)_Under_salt_stress_it_induces_the_expression_of_GAOX7_which_encodes_a_C2-O-GA_inhibitor. | -1,717 | 1,28E-08 | 1,06E-05 | 30,36 | 76,06 | 117,5  | 171,7  | 113,3   | 120,6  | 77,3   | 36,92  | 91,27 | 60,42 | 25,86 | 37,68 | 1,751  | 4,464  | 6,562  | 8,754  | 6,332  | 6,628  | 4,431  | 2,044  | 5,155   | 3,263  | 1,421  | 2,201  |        |    |       |    |       |    |        |        |        |       |
| AT4G36950 | mitogen-activated protein kinase kinase kinase 21              | member_of_MEKK_subfamily                                                                                                                                                                                                                                                                                                                                                                                                                                                                                                                                                                                                                                                                               | -1,592 | 1,69E-08 | 1,29E-05 | 96,55 | 168,3 | 186,3  | 228,6  | 259,7   | 124    | 146,9  | 27,69  | 30,42 | 88,62 | 64,64 | 50,23 | 4,497  | 7,973  | 8,4    | 9,407  | 11,72  | 5,505  | 6,798  | 1,238  | 1,387   | 3,865  | 2,868  | 2,37   |        |    |       |    |       |    |        |        |        |       |
| AT3G44860 | farnesic acid carboxyl-O-methyltransferase                     | Encodes_a_farnesic_acid_carboxyl-O-methyltransferase.                                                                                                                                                                                                                                                                                                                                                                                                                                                                                                                                                                                                                                                  | -1,101 | 1,90E-08 | 1,39E-05 | 5768  | 7124  | 7543   | 2149   | 1693    | 1395   | 6826   | 2537   | 1718  | 1098  | 634,7 | 696,3 | 289,6  | 363,9  | 366,6  | 95,33  | 82,34  | 66,75  | 340,5  | 122,2  | 84,46   | 51,63  | 30,35  | 35,41  |        |    |       |    |       |    |        |        |        |       |
| AT4G27654 |                                                                |                                                                                                                                                                                                                                                                                                                                                                                                                                                                                                                                                                                                                                                                                                        | -1,117 | 2,97E-08 | 2,10E-05 | 19,43 | 33,04 | 37,9   | 369,3  | 440,1   | 270,4  | 13,25  | 24,23  | 46,2  | 206,8 | 136,3 | 154,9 | 2,498  | 4,32   | 4,717  | 41,94  | 54,79  | 33,13  | 1,692  | 2,988  | 5,814   | 24,88  | 16,69  | 20,16  |        |    |       |    |       |    |        |        |        |       |
| AT3G51450 | Calcium-dependent phosphotriesterase superfamily protein       |                                                                                                                                                                                                                                                                                                                                                                                                                                                                                                                                                                                                                                                                                                        | -1,193 | 6,97E-08 | 4,15E-05 | 3812  | 6376  | 6179   | 2093   | 2007    | 1111   | 5152   | 3699   | 2383  | 946,6 | 564,1 | 756,3 | 182    | 309,6  | 285,5  | 88,29  | 92,78  | 50,54  | 244,3  | 169,4  | 111,4   | 42,3   | 25,64  | 36,56  |        |    |       |    |       |    |        |        |        |       |
| AT1G02920 | glutathione S-transferase 7                                    | Encodes_glutathione_transferase_belonging_to_the_phi_class_of_GSTs_Naming_convention_according_to_Wagner_et_al_(2002).                                                                                                                                                                                                                                                                                                                                                                                                                                                                                                                                                                                 | 1,576  | 7,33E-08 | 4,24E-05 | 222,3 | 582,1 | 403,2  | 118,2  | 89,85   | 93,69  | 631,4  | 581,6  | 984   | 487,8 | 203,7 | 210,2 | 14,89  | 39,66  | 26,14  | 6,997  | 5,829  | 5,98   | 42,02  | 37,37  | 64,52   | 30,59  | 13     | 14,26  |        |    |       |    |       |    |        |        |        |       |
| AT2G29350 | senescence-associated gene 13                                  | senescence-associated_gene_SAG13_encoding_a_short-chain_alcohol_dehydrogenase                                                                                                                                                                                                                                                                                                                                                                                                                                                                                                                                                                                                                          | 1,564  | 1,40E-07 | 6,85E-05 | 41,29 | 67,61 | 139,2  | 107    | 51,71   | 101,6  | 16,57  | 19,62  | 15,78 | 371,9 | 224,5 | 170,3 | 2,032  | 3,386  | 6,631  | 4,654  | 2,465  | 4,767  | 0,8102 | 0,9263 | 0,7602  | 17,14  | 10,52  | 8,487  |        |    |       |    |       |    |        |        |        |       |
| AT1G25430 | transposable element gene                                      |                                                                                                                                                                                                                                                                                                                                                                                                                                                                                                                                                                                                                                                                                                        | -1,005 | 1,74E-07 | 8,31E-05 | 369,2 | 148,3 | 256,1  | 438    | 267,4   | 404,8  | 249,6  | 161,5  | 146,5 | 204,1 | 193,9 | 150,7 | 4,294  | 1,754  | 2,884  | 4,501  | 3,012  | 4,486  | 2,884  | 1,803  | 1,668   | 2,222  | 2,148  | 1,775  |        |    |       |    |       |    |        |        |        |       |
| AT5G18470 | Curculin-like (mannose-binding) lectin family protein          |                                                                                                                                                                                                                                                                                                                                                                                                                                                                                                                                                                                                                                                                                                        | 1,104  | 2,17E-07 | 9,87E-05 | 109,3 | 156   | 134,3  | 161,2  | 162,8   | 155    | 161,2  | 121,2  | 336,9 | 448,5 | 358,5 | 219,1 | 4,548  | 6,602  | 5,409  | 5,926  | 6,563  | 6,147  | 6,666  | 4,836  | 13,72   | 17,47  | 14,2   | 9,232  |        |    |       |    |       |    |        |        |        |       |
| AT2G43535 | Scorpion toxin-like knottin superfamily protein                | Encodes_a_defensin-like_(DEFL)_family_protein.                                                                                                                                                                                                                                                                                                                                                                                                                                                                                                                                                                                                                                                         | -1,16  | 2,50E-07 | 0,00011  | 121,4 | 120,6 | 171,1  | 140,7  | 169,4   | 130,9  | 72,89  | 99,23  | 43,95 | 64,45 | 62,29 | 69,77 | 13,27  | 13,41  | 18,1   | 13,58  | 17,93  | 13,63  | 7,913  | 10,4   | 4,701   | 6,593  | 6,482  | 7,721  |        |    |       |    |       |    |        |        |        |       |
| AT1G21240 | wall associated kinase 3                                       | encodes_a_wall-associated_kinase                                                                                                                                                                                                                                                                                                                                                                                                                                                                                                                                                                                                                                                                       | 2      |          |          |       |       |        |        |         |        |        |        |       |       |       |       |        |        |        |        |        |        |        |        |         |        |        |        |        |    |       |    |       |    |        |        |        |       |

|           |                                                                          |                                                                                                                                                                                                                                                                                                                                                                                                                                                 |        |          |         |       |       |       |        |       |       |       |        |       |       |       |       |        |        |        |        |        |        |        |        |        |        |        |        |
|-----------|--------------------------------------------------------------------------|-------------------------------------------------------------------------------------------------------------------------------------------------------------------------------------------------------------------------------------------------------------------------------------------------------------------------------------------------------------------------------------------------------------------------------------------------|--------|----------|---------|-------|-------|-------|--------|-------|-------|-------|--------|-------|-------|-------|-------|--------|--------|--------|--------|--------|--------|--------|--------|--------|--------|--------|--------|
| AT1G05680 | Uridine diphosphate glycosyltransferase 74E2                             | Encodes_a_UDP-glycosyltransferase_UGT74E2_that_acts_on_IBA_(indole-3-butyrac_acid)_and_affects_auxin_homeostasis_The_transcript_and_p_rtein_levels_of_this_enzyme_are_strongly_induced_by_H2O2_and_may_allow_integration_of_ROS_(reactive_oxygen_species)_and_auxi_n_signaling_This_enzyme_can_also_transfer_glycosyl_groups_to_sev_eral_compounds_related_to_the_explosive_TNT_when_this_syntheti_c_compound_is_taken_up_from_the_environment. | 3,338  | 2,90E-07 | 0,00012 | 248,3 | 1,537 | 11,37 | 11,89  | 5,501 | 37,9  | 0     | 1,154  | 7,888 | 374,6 | 102,3 | 58,61 | 10,14  | 0,0638 | 0,4493 | 0,4288 | 0,2175 | 1,474  | 0      | 0,0452 | 0,3152 | 14,31  | 3,975  | 2,422  |
| AT3G60170 | transposable element gene                                                |                                                                                                                                                                                                                                                                                                                                                                                                                                                 | 2,57   | 3,23E-07 | 0,00013 | 4,858 | 11,52 | 11,37 | 7,266  | 2,2   | 6,89  | 43,07 | 24,23  | 21,41 | 28,2  | 35,26 | 36,28 | 0,0749 | 0,1807 | 0,1697 | 0,099  | 0,0329 | 0,1012 | 0,6595 | 0,3583 | 0,323  | 0,4068 | 0,5175 | 0,5663 |
| AT1G62440 | leucine-rich repeat/extensin 2                                           | encodes_a_paralog_of_LRX1_(LEUCINE-RICH_REPEAT/EXTENSIN_1)_which_acts_synergistically_with_LRX1_in_root_hair_cell_morphogenesis.                                                                                                                                                                                                                                                                                                                | 2,792  | 7,26E-07 | 0,00028 | 15,18 | 63,77 | 50,36 | 2,642  | 9,902 | 3,445 | 24,3  | 57,69  | 64,23 | 51,02 | 35,26 | 23,72 | 0,3791 | 1,62   | 1,217  | 0,0583 | 0,2395 | 0,082  | 0,6028 | 1,382  | 1,57   | 1,193  | 0,8386 | 0,5999 |
| AT3G48520 | cytochrome P450, family 94, subfamily B, polypeptide 3                   | member_of_CYP94B                                                                                                                                                                                                                                                                                                                                                                                                                                | -1,371 | 7,55E-07 | 0,00028 | 184   | 609,3 | 1046  | 375,2  | 174,9 | 263,6 | 342,3 | 159,2  | 182,5 | 108,8 | 70,52 | 134   | 6,729  | 22,67  | 37,04  | 12,12  | 6,197  | 9,185  | 12,44  | 5,587  | 6,536  | 3,724  | 2,456  | 4,962  |
| AT3G25010 | receptor like protein 41                                                 | encodes_a_member_of_the_DREB_subfamily_A-5_of_ERF/AP2_transcription_factor_family_The_protein_contains_o_ne_AP2_domain_There_are_15_members_in_this_subfamily_includi_ng_RAP2.1_,_RAP2.9_and_RAP2.10.                                                                                                                                                                                                                                           | 1,593  | 1,29E-06 | 0,00044 | 34    | 39,18 | 63,9  | 591,2  | 509,4 | 389,3 | 34,23 | 79,62  | 133   | 334,3 | 181   | 228,8 | 2,295  | 2,69   | 4,175  | 35,26  | 33,3   | 25,04  | 2,296  | 5,155  | 8,785  | 21,12  | 11,63  | 15,64  |
| AT2G04495 |                                                                          |                                                                                                                                                                                                                                                                                                                                                                                                                                                 | 1,243  | 2,80E-06 | 0,0008  | 33,4  | 33,04 | 41,15 | 36,33  | 60,51 | 46,51 | 39,76 | 31,15  | 89,02 | 124,9 | 102,3 | 106,1 | 2,199  | 2,213  | 2,623  | 2,114  | 3,859  | 2,918  | 2,601  | 1,968  | 5,738  | 7,697  | 6,412  | 7,071  |
| AT5G10930 | CBL-interacting protein kinase 5                                         | Encodes_CBL-interacting_protein_kinase_5_(CIKPS).                                                                                                                                                                                                                                                                                                                                                                                               | -1,098 | 3,07E-06 | 0,00083 | 499,7 | 72,99 | 106,7 | 183    | 203,5 | 117,1 | 136,9 | 101,5  | 74,37 | 72,51 | 81,1  | 82,33 | 17,7   | 2,63   | 3,658  | 5,727  | 6,984  | 3,954  | 4,82   | 3,451  | 2,579  | 2,405  | 2,736  | 2,954  |
| AT3G15630 |                                                                          |                                                                                                                                                                                                                                                                                                                                                                                                                                                 | 1,089  | 3,36E-06 | 0,00089 | 250,2 | 485,6 | 403,4 | 61,43  | 77,02 | 79,24 | 512,4 | 851,6  | 920,5 | 138,3 | 131,6 | 184,2 | 20,58  | 40,64  | 32,13  | 4,466  | 6,138  | 6,213  | 41,89  | 67,22  | 74,15  | 10,65  | 10,31  | 15,35  |
| ATCG01050 | NADH-Ubiquinone/plastoquinone (complex I) protein                        | Represents_a_plastid-encoded_subunit_of_a_NAD(P)H_dehydrogenase_complex_Its_mRNA_is_edited_at_four_positions_Translation_data_is_not_available_for_this_gene.                                                                                                                                                                                                                                                                                   | -1,405 | 4,89E-06 | 0,00121 | 88,65 | 50,71 | 92,05 | 110,3  | 78,12 | 91,3  | 68,47 | 35,77  | 47,33 | 30,88 | 24,68 | 50,23 | 3,611  | 2,101  | 3,63   | 3,97   | 3,082  | 3,544  | 2,771  | 1,398  | 1,887  | 1,178  | 0,9575 | 2,072  |
| AT5G52020 | Integrase-type DNA-binding superfamily protein                           | encodes_a_member_of_the_DREB_subfamily_A-4_of_ERF/AP2_transcription_factor_family_The_protein_contains_o_ne_AP2_domain_There_are_17_members_in_this_subfamily_includi_ng_TINY.                                                                                                                                                                                                                                                                  | -1,396 | 8,35E-06 | 0,00194 | 3,643 | 5,378 | 21,66 | 72     | 70,42 | 89,57 | 4,417 | 3,462  | 19,16 | 30,88 | 19,98 | 36,28 | 0,2278 | 0,342  | 1,311  | 3,977  | 4,264  | 5,336  | 0,2744 | 0,2076 | 1,172  | 1,808  | 1,19   | 2,297  |
| AT1G52200 | PLAC8 family protein                                                     |                                                                                                                                                                                                                                                                                                                                                                                                                                                 | 1,005  | 1,11E-05 | 0,00246 | 221,6 | 331,1 | 234,5 | 94,46  | 63,81 | 122,3 | 589,7 | 483,5  | 791   | 166,5 | 184,5 | 199,5 | 15,29  | 23,24  | 15,66  | 5,758  | 4,264  | 8,041  | 40,43  | 32     | 53,43  | 10,75  | 12,12  | 13,94  |
| AT1G01250 | Integrase-type DNA-binding superfamily protein                           | encodes_a_member_of_the_DREB_subfamily_A-4_of_ERF/AP2_transcription_factor_family_The_protein_contains_o_ne_AP2_domain_There_are_17_members_in_this_subfamily_includi_ng_TINY.                                                                                                                                                                                                                                                                  | -1,078 | 1,13E-05 | 0,00249 | 37,65 | 9,22  | 25,99 | 120,9  | 112,2 | 105,1 | 11,04 | 13,85  | 6,761 | 56,39 | 63,47 | 39,07 | 2,777  | 0,6918 | 1,856  | 7,878  | 8,017  | 7,385  | 0,8093 | 0,9798 | 0,4882 | 3,894  | 4,458  | 2,919  |
| AT3G26830 | Cytochrome P450 superfamily protein                                      | Mutations_in_pad3_are_defective_in_biosynthesis_of_the_indole_de_rived_phytoalexin_camalexin_Encodes_a_cytochrome_P450_enzyme_that_catalyzes_the_conversion_of_dihydrocamalexin_acid_to_camalexin.                                                                                                                                                                                                                                              | 4,411  | 1,32E-05 | 0,00284 | 30,36 | 23,82 | 7,039 | 2,642  | 5,501 | 5,168 | 13,25 | 3,462  | 11,27 | 261,8 | 5,877 | 16,74 | 1,133  | 0,9043 | 0,2543 | 0,0871 | 0,1989 | 0,1838 | 0,4914 | 0,1239 | 0,4117 | 9,149  | 0,2089 | 0,6329 |
| AT2G18190 | P-loop containing nucleoside triphosphate hydrolases superfamily protein |                                                                                                                                                                                                                                                                                                                                                                                                                                                 | 4,674  | 1,58E-05 | 0,00317 | 24,97 | 1,537 | 0     | 0,6606 | 0     | 0     | 0     | 0,0346 | 1,127 | 18,89 | 12,93 | 2,791 | 1,042  | 0,0652 | 0      | 0,0244 | 0      | 0      | 0      | 0,0014 | 0,046  | 0,7379 | 0,5137 | 0,1179 |
| AT1G78440 | Arabidopsis thaliana gibberellin 2-oxidase 1                             | Encodes_a_gibberellin_2-oxidase_that_acts_on_C19_gibberellins.                                                                                                                                                                                                                                                                                                                                                                                  | -2,445 | 2,12E-05 | 0,00413 | 15,79 | 6,915 | 2,166 | 36,33  | 26,41 | 22,39 | 1,104 | 5,769  | 1,127 | 9,399 | 5,877 | 0     | 0,7991 | 0,3561 | 0,1061 | 1,625  | 1,295  | 1,08   | 0,0555 | 0,2802 | 0,0558 | 0,4454 | 0,2833 | 0      |
| AT2G38240 | 2-oxoglutarate (2OG) and Fe(II)-dependent oxygenase superfamily protein  |                                                                                                                                                                                                                                                                                                                                                                                                                                                 | -2,247 | 2,76E-05 | 0,00527 | 936,9 | 6140  | 5256  | 65,4   | 68,21 | 24,12 | 3524  | 2294   | 844   | 17,46 | 14,1  | 1,395 | 43,42  | 289,5  | 235,8  | 2,678  | 3,062  | 1,065  | 162,2  | 102    | 38,29  | 0,7573 | 0,6224 | 0,0655 |
| AT4G27970 | SLAC1 homologue 2                                                        | Encodes_a_protein_with_ten_predicted_transmembrane_helices_The_SLAH2_protein_has_similarity_to_the_SLAC1_protein_involved_in_ion_homeostasis_in_guard_cells_But_it_is_not_expressed_in_guard_cells_and_cannot_complement_a_slac1-2_mutant_suggesting_that_it_performs_a_different_function_SLAH2:GFP_localizes_to_the_plasma_membrane.                                                                                                          | 1,205  | 2,82E-05 | 0,00528 | 72,86 | 236,6 | 181,9 | 63,41  | 89,12 | 62,01 | 271,7 | 200,8  | 286,2 | 126,2 | 126,9 | 238,6 | 2,875  | 9,5    | 6,951  | 2,211  | 3,406  | 2,332  | 10,65  | 7,601  | 11,06  | 4,663  | 4,77   | 9,536  |
| AT1G30135 | jasmonate-zim-domain protein 8                                           |                                                                                                                                                                                                                                                                                                                                                                                                                                                 | -1,275 | 3,18E-05 | 0,00572 | 117,2 | 381,1 | 302,1 | 229,2  | 333,4 | 186   | 361,1 | 75     | 121,7 | 166,5 | 64,64 | 78,14 | 12,87  | 42,58  | 32,13  | 22,25  | 35,47  | 19,47  | 39,41  | 7,904  | 13,09  | 17,12  | 6,763  | 8,693  |
| AT1G53903 | Protein of unknown function (DUF581)                                     |                                                                                                                                                                                                                                                                                                                                                                                                                                                 | -1,021 | 3,21E-05 | 0,00572 | 1233  | 1267  | 1587  | 901,2  | 1380  | 652,2 | 1261  | 621,3  | 541,1 | 666,2 | 394,3 | 382,5 | 121,1  | 126,6  | 150,9  | 78,19  | 131,3  | 61,02  | 123    | 58,52  | 52,01  | 61,24  | 36,87  | 38,03  |
| AT1G49530 | geranylgeranyl pyrophosphate synthase 6                                  | encodes_a_mitochondria-targeted_geranylgeranyl_pyrophosphate_synthase                                                                                                                                                                                                                                                                                                                                                                           | -1,11  | 3,24E-05 | 0,00573 | 251,4 | 330,4 | 420,7 | 91,82  | 117,7 | 84,41 | 234,1 | 113,1  | 133   | 48,34 | 38,79 | 48,84 | 12,35  | 16,51  | 20,01  | 3,986  | 5,602  | 3,952  | 11,43  | 5,33   | 6,396  | 2,223  | 1,815  | 2,43   |
| AT2G04050 | MATE efflux family protein                                               |                                                                                                                                                                                                                                                                                                                                                                                                                                                 | 2,535  | 3,38E-05 | 0,00588 | 452,3 | 5,37  | 3,79  | 18,5   | 28,61 | 56,86 | 7,73  | 8,077  | 21,41 | 440,4 | 103,4 | 48,84 | 19,58  | 0,2365 | 0,1589 | 0,7076 | 1,2    | 2,346  | 0,3325 | 0,3355 | 0,9075 | 17,85  | 4,265  | 2,141  |
| AT4G25000 | alpha-amylase-like                                                       | Predicted_to_be_secreted_protein_based_on_signalP_prediction_Involved_in_starch_mobilization_Mutants_are_defective_in_alpha-amylase_activity_(Note:_AMY1_has_been_found_in_the_literature_t_o_be_referred_to_as_AMY3_which_is_not_to_be_confused_with_AMY3/At1g69830).                                                                                                                                                                          | 1,482  | 3,40E-05 | 0,00588 | 24,29 | 101,4 | 95,3  | 33,03  | 35,21 | 53,4  | 47,49 | 69,23  | 33,81 | 165,2 | 109,3 | 57,21 | 1,051  | 4,464  | 3,992  | 1,263  | 1,475  | 2,202  | 2,041  | 2,874  | 1,432  | 6,689  | 4,504  | 2,507  |
| AT3G44300 | nitrilase 2                                                              | Encodes_an_enzyme_that_catalyzes_the_hydrolysis_of_indole-3-acetonitrile_(IAN)_to_indole-3-acetic_acid_(IAA)_[nitrile_aminohydrolase_EC_3.5.5.1]_and_IAN_to_indole-3-acetamide_(IAM)_at_lower_levels_Mutants_have_reduced_sensitivit_y_to_IAN_and_are_sensitive_to_IAA_This_enzyme_likely_participate_s_in_other_non-auxin-related_metabolic_pathways.                                                                                          | 3,217  | 3,46E-05 | 0,00588 | 3,036 | 348   | 57,05 | 72,77  | 15,41 | 27,58 | 1,104 | 40,39  | 3,381 | 829,5 | 30,9  | 223,1 | 0,1322 | 15,41  | 2,405  | 2,799  | 0,65   | 1,144  | 0,0478 | 1,687  | 0,1441 | 33,81  | 1,281  | 9,837  |
| AT2G04040 | MATE efflux family protein                                               | ATDTX1_(At2g04040)_has_been_identified_as_a_detoxifying_efflux_c_arrier_for_plant-derived_antibiotics_and_other_toxic_compounds_including_CD2+.                                                                                                                                                                                                                                                                                                 | 3,998  | 4,70E-05 | 0,00753 | 48,52 | 5,378 | 1,083 | 0,6606 | 0     | 6,89  | 1,104 | 4,615  | 4,507 | 80,56 | 10,55 | 11,16 | 1,95   | 0,2198 | 0,0421 | 0,0235 | 0      | 0,2638 | 0,0441 | 0,1779 | 0,1773 | 3,03   | 0,4039 | 0,4542 |
| AT3G57240 | beta-1,3-glucanase 3                                                     | encodes_a_member_of_glycosyl_hydrolase_family_17                                                                                                                                                                                                                                                                                                                                                                                                | 1,514  | 5,12E-05 | 0,00814 | 459,7 | 421   | 385   | 35,67  | 18,7  | 34,45 | 650,5 | 410,8  | 456,4 | 45,65 | 98,73 | 107,4 | 23,15  | 21,57  | 18,77  | 1,588  | 0,9125 | 1,654  | 32,55  | 19,85  | 22,5   | 2,153  | 4,736  | 5,481  |
| AT1G29715 |                                                                          |                                                                                                                                                                                                                                                                                                                                                                                                                                                 | 3,98   | 5,93E-05 | 0,00898 | 9,715 | 13,83 | 7,039 | 0      | 1,1   | 0     | 13,25 | 12,69  | 13,52 | 8,056 | 7,052 | 6,977 | 0,2602 | 0,3768 | 0,1825 | 0      | 0,0286 | 0      | 0,3527 | 0,3262 | 0,3546 | 0,202  | 0,1799 | 0,1893 |
| AT2G38760 | annexin 3                                                                | Annexins_are_calcium_binding_proteins_that_are_localized_in_the_cytoplasm_When_cytosolic_Ca2+_increases_they_relocate_to_the_plasma_membrane.                                                                                                                                                                                                                                                                                                   | -1,48  | 6,50E-05 | 0,00947 | 114,2 | 255,1 | 170   | 50,2   | 92,42 | 51,68 | 122,6 | 101,5  | 57,47 | 25,51 | 19,98 | 23,72 | 5,717  | 13     | 8,244  | 2,222  | 4,484  | 2,466  | 6,1    | 4,879  | 2,818  | 1,196  | 0,953  | 1,203  |
| AT1G26380 | FAD-binding Berberine family protein                                     |                                                                                                                                                                                                                                                                                                                                                                                                                                                 | 3,478  | 7,06E-05 | 0,00997 | 9,715 | 34,57 | 7,581 | 5,945  | 4,401 | 5,168 | 4,417 | 15     | 14,65 | 157,1 | 11,75 | 9,768 | 0,3359 | 1,216  | 0,2537 | 0,1816 | 0,1474 | 0,1703 | 0,1517 | 0,4976 | 0,4958 | 5,085  | 0,387  | 0,342  |
| AT1G14780 | MAC/Perforin domain-containing protein                                   |                                                                                                                                                                                                                                                                                                                                                                                                                                                 | 1,125  | 8,42E-05 | 0,01131 | 60,72 | 152,9 | 233,9 | 31,71  | 36,31 | 56,84 | 87,24 | 106,2  | 122,8 | 80,56 | 92,85 | 86,52 | 1,715  | 4,394  | 6,398  | 0,7915 | 0,9935 | 1,53   | 2,449  | 2,877  | 3,397  | 2,131  | 2,498  | 2,475  |
| AT5G02490 | Heat shock protein 70 (Hsp 70) family protein                            |                                                                                                                                                                                                                                                                                                                                                                                                                                                 | 1,285  | 9,44E-05 | 0,01251 | 90,47 | 173,6 | 102,9 | 81,25  | 86,92 | 136,1 | 90,56 | 48,46  | 76,63 | 402,8 | 190,4 | 138,1 | 2,432  | 4,748  | 2,677  | 1,93   | 2,263  | 3,485  | 2,418  | 1,25   | 2,016  | 10,14  | 4,874  | 3,76   |

|           |                                                                          |                                                                                                                                                                                                                                                                                                                                                                                                                                                                                                                                                                 |        |          |         |        |        |        |       |       |       |       |       |       |       |       |        |        |        |        |        |        |        |        |        |        |        |        |        |
|-----------|--------------------------------------------------------------------------|-----------------------------------------------------------------------------------------------------------------------------------------------------------------------------------------------------------------------------------------------------------------------------------------------------------------------------------------------------------------------------------------------------------------------------------------------------------------------------------------------------------------------------------------------------------------|--------|----------|---------|--------|--------|--------|-------|-------|-------|-------|-------|-------|-------|-------|--------|--------|--------|--------|--------|--------|--------|--------|--------|--------|--------|--------|--------|
| AT4G21380 | receptor kinase 3                                                        | encodes_a_putative_receptor-like_serine/threonine_protein_kinases_that_is_similar_to_Brassica_s_elf-incompatibility_(S)_locus_Expressed_in_root_Shoot_expression_limited_to_limited_to_the_root-hypocotyl_transition_zone_and_at_the_base_of_lateral_roots_as_well_as_in_axillary_buds_and_pedicels.                                                                                                                                                                                                                                                            | 0,4797 | 9,53E-05 | 0,01253 | 1699   | 1208   | 1398   | 686,3 | 634,8 | 623,6 | 1206  | 949,6 | 839,5 | 828,5 | 861,5 | 1006   | 35,29  | 25,52  | 28,1   | 12,6   | 12,77  | 12,34  | 24,89  | 18,92  | 17,07  | 16,11  | 17,04  | 21,16  |
| AT3G19030 |                                                                          |                                                                                                                                                                                                                                                                                                                                                                                                                                                                                                                                                                 | -0,471 | 9,62E-05 | 0,01257 | 919,9  | 885,9  | 1443   | 2616  | 2291  | 2491  | 1029  | 1168  | 1707  | 1862  | 1795  | 1642   | 127,8  | 125,2  | 194,1  | 321,1  | 308,2  | 329,7  | 142,1  | 155,6  | 232,2  | 242,2  | 237,4  | 231,1  |
| AT1G56650 | production of anthocyanin pigment 1                                      | Encodes_a_putative_MYB_domain_containing_transcription_factor_involved_in_anthocyanin_metabolism_and_radical_scavenging_Essential_for_the_sucrose-mediated_expression_of_the_dihydroflavonol_reductase_gene                                                                                                                                                                                                                                                                                                                                                     | -1,148 | 9,99E-05 | 0,01296 | 76,51  | 43,79  | 46,57  | 152,6 | 152,9 | 80,96 | 22,09 | 18,46 | 6,761 | 72,51 | 63,47 | 39,07  | 5,186  | 3,02   | 3,056  | 9,139  | 10,04  | 5,229  | 1,488  | 1,201  | 0,4487 | 4,601  | 4,097  | 2,682  |
| AT2G18193 | P-loop containing nucleoside triphosphate hydrolases superfamily protein |                                                                                                                                                                                                                                                                                                                                                                                                                                                                                                                                                                 | 2,007  | 0,0001   | 0,01336 | 485,1  | 27,66  | 22,2   | 23,12 | 37,41 | 65,46 | 39,76 | 46,12 | 64,23 | 339,6 | 85,8  | 71,17  | 17,71  | 1,027  | 0,7847 | 0,7458 | 1,323  | 2,277  | 1,442  | 1,615  | 2,296  | 11,61  | 2,983  | 2,631  |
| AT3G28890 | receptor like protein 43                                                 |                                                                                                                                                                                                                                                                                                                                                                                                                                                                                                                                                                 | 1,085  | 0,00015  | 0,01779 | 131,2  | 108,3  | 95,06  | 53,51 | 31,91 | 44,79 | 122,1 | 89,89 | 63,1  | 115,5 | 77,58 | 85,12  | 3,523  | 2,96   | 2,471  | 1,27   | 0,83   | 1,146  | 3,258  | 2,316  | 1,659  | 2,903  | 1,984  | 2,315  |
| AT4G08570 | Heavy metal transport/detoxification superfamily protein                 |                                                                                                                                                                                                                                                                                                                                                                                                                                                                                                                                                                 | -1,14  | 0,0002   | 0,02248 | 24,29  | 2,305  | 3,249  | 87,2  | 94,62 | 63,73 | 2,209 | 5,769 | 1,127 | 38,94 | 48,19 | 23,72  | 1,379  | 0,1332 | 0,1786 | 4,375  | 5,205  | 3,449  | 0,1246 | 0,3143 | 0,0627 | 2,07   | 2,606  | 1,364  |
| AT2G18690 |                                                                          |                                                                                                                                                                                                                                                                                                                                                                                                                                                                                                                                                                 | 1,119  | 0,0002   | 0,02248 | 154,8  | 269,7  | 187,4  | 146,6 | 205,7 | 189,5 | 323,6 | 211,2 | 496,9 | 656,6 | 289,1 | 226,1  | 7,08   | 12,54  | 8,293  | 5,925  | 9,112  | 8,256  | 14,7   | 9,263  | 22,24  | 28,11  | 12,59  | 10,47  |
| AT1G16370 | organic cation/carnitine transporter 6                                   |                                                                                                                                                                                                                                                                                                                                                                                                                                                                                                                                                                 | -1,236 | 0,00021  | 0,02316 | 72,26  | 273,5  | 167,9  | 62,09 | 75,92 | 49,95 | 89,45 | 102,7 | 61,98 | 32,23 | 19,98 | 27,91  | 2,552  | 9,828  | 5,74   | 1,938  | 2,597  | 1,681  | 3,139  | 3,448  | 2,143  | 1,066  | 0,6721 | 0,9983 |
| AT1G17170 | glutathione S-transferase TAU 24                                         | Encodes_glutathione_transferase_belonging_to_the_tau_class_of_GSTs_Naming_convention_according_to_Wagner_et_al_(2002).                                                                                                                                                                                                                                                                                                                                                                                                                                          | 1,956  | 0,00022  | 0,02362 | 6,072  | 3,842  | 20,58  | 16,51 | 15,4  | 10,34 | 5,522 | 9,231 | 2,254 | 48,34 | 19,98 | 99,07  | 0,44   | 0,2832 | 1,443  | 1,057  | 1,081  | 0,7137 | 0,3976 | 0,6417 | 0,1599 | 3,279  | 1,379  | 7,271  |
| AT3G28580 | P-loop containing nucleoside triphosphate hydrolases superfamily protein |                                                                                                                                                                                                                                                                                                                                                                                                                                                                                                                                                                 | 3,371  | 0,00023  | 0,02454 | 21,86  | 3,842  | 2,166  | 1,982 | 6,601 | 5,168 | 2,209 | 3,462 | 7,888 | 123,5 | 9,402 | 0,7934 | 0,1418 | 0,0761 | 0,0636 | 0,2321 | 0,1787 | 0,0797 | 0,1205 | 0,2803 | 4,197  | 0,325  | 0,3078 |        |
| AT1G77855 |                                                                          |                                                                                                                                                                                                                                                                                                                                                                                                                                                                                                                                                                 | -1,048 | 0,00023  | 0,02454 | 32,18  | 20,74  | 15,16  | 72    | 96,82 | 78,36 | 12,15 | 23,08 | 12,4  | 32,23 | 43,49 | 41,86  | 1,716  | 1,125  | 0,7826 | 3,392  | 5      | 3,981  | 0,6435 | 1,18   | 0,647  | 1,609  | 2,208  | 2,26   |
| AT1G17960 | Threonyl-tRNA synthetase                                                 |                                                                                                                                                                                                                                                                                                                                                                                                                                                                                                                                                                 | 2,573  | 0,00031  | 0,03072 | 66,19  | 1,537  | 3,79   | 2,642 | 3,301 | 0     | 3,313 | 4,615 | 4,507 | 20,14 | 8,227 | 13,95  | 2,62   | 0,0619 | 0,1453 | 0,0924 | 0,1266 | 0      | 0,1303 | 0,1753 | 0,1747 | 0,7465 | 0,3102 | 0,5595 |
| AT3G22275 |                                                                          |                                                                                                                                                                                                                                                                                                                                                                                                                                                                                                                                                                 | -1,287 | 0,00031  | 0,03108 | 116    | 303,5  | 188,4  | 64,08 | 95,72 | 105,1 | 226,4 | 40,39 | 33,81 | 57,74 | 28,21 | 20,93  | 10,94  | 29,11  | 17,2   | 5,339  | 8,743  | 9,442  | 21,21  | 3,654  | 3,121  | 5,097  | 2,533  | 1,999  |
| AT3G23550 | MATE efflux family protein                                               |                                                                                                                                                                                                                                                                                                                                                                                                                                                                                                                                                                 | 1,47   | 0,00042  | 0,03735 | 247,1  | 997,3  | 1047   | 46,9  | 44,01 | 5,168 | 1443  | 1518  | 1836  | 75,19 | 104,6 | 97,68  | 9,451  | 38,8   | 38,77  | 1,585  | 1,63   | 0,1883 | 54,85  | 55,72  | 68,73  | 2,692  | 3,81   | 3,783  |
| AT3G09640 | ascorbate peroxidase 2                                                   | Encodes_a_cytosolic_ascorbate_peroxidase_APX2_Ascorbate_peroxidases_are_enzymes_that_scavenge_hydrogen_peroxide_in_plant_cells_Eight_types_of_APX_have_been_described_for_Arabidopsis:three_cytosolic_(APX1_APX2_APX6)_two_chloroplastic_types_(stroma_APX3_thylakoid_APX4)_and_three_microsomal_(APX3_APX4_APX5)_isoforms.                                                                                                                                                                                                                                     | -1,669 | 0,00045  | 0,0399  | 0,6072 | 1,537  | 1,083  | 25,1  | 36,31 | 39,62 | 1,104 | 2,308 | 0     | 9,386 | 15,28 | 5,582  | 0,0368 | 0,0946 | 0,0635 | 1,343  | 2,129  | 2,285  | 0,0664 | 0,134  | 0      | 0,5319 | 0,8808 | 0,3422 |
| AT1G63030 | Integrase-type DNA-binding superfamily protein                           | encodes_a_member_of_the_DREB_subfamily_A-1_of_ERF/AP2_transcription_factor_family_(DDF2)_The_protein_contains_one_AP2_domain_There_are_six_members_in_this_subfamily_including_CBF1_CBF2_and_CBF3_Overexpression_of_this_gene_results_in_the_reduction_of_gibberellic_acid_biosynthesis_This_gene_is_expressed_in_all_tissues_examined_but_most_abundantly_expressed_in_rose_tea_leaves_and_stems_Overexpression_of_DDF1_a_putative_paralog_of_this_gene_also_reduces_gibberellic_acid_biosynthesis_and_makes_the_plants_more_tolerant_to_high_salinity_levels. | -2,258 | 0,00052  | 0,04448 | 1,214  | 0,7683 | 2,707  | 21,14 | 12,1  | 25,84 | 1,104 | 3,462 | 12,4  | 8,056 | 1,175 | 2,791  | 0,0895 | 0,0576 | 0,1932 | 1,377  | 0,8641 | 1,815  | 0,0809 | 0,2448 | 0,8945 | 0,556  | 0,0825 | 0,2083 |
| AT5G60250 | zinc finger (C3HC4-type RING finger) family protein                      |                                                                                                                                                                                                                                                                                                                                                                                                                                                                                                                                                                 | 1,473  | 0,00053  | 0,04497 | 8,501  | 13,06  | 8,122  | 17,84 | 14,3  | 13,78 | 14,36 | 6,923 | 10,14 | 40,28 | 28,21 | 61,4   | 0,2421 | 0,3785 | 0,224  | 0,4489 | 0,3946 | 0,3741 | 0,4063 | 0,1892 | 0,2828 | 1,074  | 0,7652 | 1,771  |
| AT5G66740 | Protein of unknown function (DUF620)                                     |                                                                                                                                                                                                                                                                                                                                                                                                                                                                                                                                                                 | -1,711 | 0,00059  | 0,04865 | 15,18  | 19,21  | 25,99  | 23,78 | 26,41 | 29,28 | 13,25 | 12,69 | 6,761 | 5,877 | 12,56 | 0,845  | 1,088  | 1,401  | 1,17   | 1,424  | 1,553  | 0,7329 | 0,6778 | 0,3684 | 0,2799 | 0,3115 | 0,708  |        |
| AT1G30730 | FAD-binding Berberine family protein                                     |                                                                                                                                                                                                                                                                                                                                                                                                                                                                                                                                                                 | 1,303  | 0,00064  | 0,05201 | 5,465  | 20,74  | 14,08  | 25,1  | 14,3  | 13,78 | 5,522 | 24,23 | 61,98 | 49,68 | 49,36 | 37,68  | 0,2014 | 0,7778 | 0,5023 | 0,8174 | 0,5106 | 0,484  | 0,2022 | 0,8568 | 2,236  | 1,714  | 1,733  | 1,406  |
| AT2G22770 | basic helix-loop-helix (bHLH) DNA-binding superfamily protein            | regulates_the_development_of_ER_bodies_also_involves_in_response_to_the_endophytic_fungus_Piriformospora_indica                                                                                                                                                                                                                                                                                                                                                                                                                                                 | -1,018 | 0,00067  | 0,05347 | 302,4  | 623,9  | 342,8  | 171,1 | 331,2 | 144,7 | 293,8 | 171,9 | 102,5 | 84,59 | 94,02 | 139,5  | 13,67  | 28,7   | 15,01  | 6,836  | 14,51  | 6,235  | 13,2   | 7,459  | 4,54   | 3,581  | 4,05   | 6,391  |
| AT5G10970 | C2H2 and C2HC zinc fingers superfamily protein                           |                                                                                                                                                                                                                                                                                                                                                                                                                                                                                                                                                                 | -2,031 | 0,00069  | 0,05452 | 6,679  | 9,988  | 8,122  | 19,82 | 18,7  | 20,67 | 3,313 | 18,46 | 10,14 | 5,371 | 8,227 | 0      | 0,5053 | 0,7686 | 0,5948 | 1,325  | 1,37   | 1,49   | 0,249  | 1,34   | 0,7511 | 0,3804 | 0,5927 | 0      |
| AT3G13790 | Glycosyl hydrolases family 32 protein                                    | Encodes_a_protein_with_invertase_activity.                                                                                                                                                                                                                                                                                                                                                                                                                                                                                                                      | 1,137  | 0,00072  | 0,05568 | 150    | 347,3  | 250,7  | 23,12 | 29,71 | 18,95 | 265   | 278,1 | 333,5 | 48,34 | 58,77 | 51,63  | 4,744  | 11,18  | 7,678  | 0,6462 | 0,9102 | 0,5712 | 8,331  | 8,44   | 10,33  | 1,432  | 1,77   | 1,654  |
| AT1G76930 | extensin 4                                                               | Encodes_an_Arabidopsis_extensin_gene_that_belongs_to_cell-wall_hydroxyproline-rich_glycoproteins_The_cross-link_of_extensins_enforces_cell_wall_strength_Transgenic_plants_overeexpressing_this_gene_show_an_increase_in_stem_thickness.                                                                                                                                                                                                                                                                                                                        | 1,38   | 0,00074  | 0,05672 | 10,93  | 167,4  | 24,37  | 12,55 | 19,8  | 17,23 | 15,46 | 25,38 | 38,31 | 29,54 | 44,66 | 51,63  | 0,6253 | 9,742  | 1,349  | 0,6344 | 1,097  | 0,939  | 0,8788 | 1,393  | 2,146  | 1,582  | 2,433  | 2,991  |
| AT1G13520 | Protein of unknown function (DUF1262)                                    |                                                                                                                                                                                                                                                                                                                                                                                                                                                                                                                                                                 | 3,313  | 0,00074  | 0,05672 | 4,25   | 8,451  | 0,5415 | 1,321 | 2,2   | 3,445 | 4,417 | 0     | 0     | 53,71 | 12,93 | 1,395  | 0,2077 | 0,4201 | 0,0256 | 0,057  | 0,1041 | 0,1604 | 0,2145 | 0      | 0      | 2,457  | 0,6016 | 0,0691 |
| AT1G35230 | arabinogalactan protein 5                                                | Encodes_arabinogalactan-protein_(AGP5).                                                                                                                                                                                                                                                                                                                                                                                                                                                                                                                         | 1,001  | 0,00075  | 0,05676 | 77,72  | 55,32  | 39,53  | 46,9  | 29,71 | 29,28 | 53,01 | 28,85 | 54,09 | 75,19 | 76,6  | 65,58  | 7,83   | 5,669  | 3,855  | 4,175  | 2,899  | 2,811  | 5,306  | 2,788  | 5,334  | 7,092  | 7,329  | 6,691  |
| AT2G03760 | sulphotransferase 12                                                     | Encodes_a_brassinosteroid_sulphotransferase_in_vitro_experiments_show_that_this_enzyme_has_a_preference_for_24-epibrassinosteroids_particularly_24-epicathasterone_but_does_not_act_on_castasterone_and_brassinolide_It_is_differentially_expressed_during_development_being_more_abundant_in_young_seedlings_and_actively_growing_cell_cultures_Expression_is_induced_in_response_to_salicylic_acid_and_methyl_jasmonate_and_bacterial_pathogens.                                                                                                              | 1,031  | 0,00085  | 0,06186 | 505,2  | 175,9  | 164,6  | 186,3 | 161,7 | 206,7 | 172,3 | 211,2 | 197,2 | 655,2 | 236,2 | 237,2  | 23,59  | 8,356  | 7,44   | 6,785  | 7,314  | 9,196  | 7,992  | 9,458  | 9,013  | 28,64  | 10,5   | 11,22  |
| AT1G58225 |                                                                          |                                                                                                                                                                                                                                                                                                                                                                                                                                                                                                                                                                 | 1,015  | 0,00089  | 0,06393 | 115,4  | 148,3  | 36,82  | 33,69 | 37,41 | 60,29 | 129,2 | 35,77 | 72,12 | 107,4 | 82,27 | 65,58  | 11,08  | 14,49  | 3,424  | 2,859  | 3,48   | 5,518  | 12,33  | 3,296  | 6,782  | 9,661  | 7,526  | 6,38   |
| AT5G25260 | SPFH/Band 7/PHB domain-containing membrane-associated protein family     |                                                                                                                                                                                                                                                                                                                                                                                                                                                                                                                                                                 | 1,957  | 0,00105  | 0,07193 | 15,18  | 11,52  | 4,873  | 13,21 | 12,15 | 12,06 | 21,05 | 8,077 | 6,772 | 104,9 | 21,03 | 20,93  | 0,5659 | 0,437  | 0,1759 | 0,4352 | 0,4386 | 0,4283 | 0,7796 | 0,2889 | 0,2471 | 3,661  | 0,7465 | 0,7902 |
| AT3G04220 | Disease resistance protein (TIR-NBS-LRR class) family                    |                                                                                                                                                                                                                                                                                                                                                                                                                                                                                                                                                                 | 1,2    | 0,00106  | 0,07193 | 21,25  | 26,89  | 10,83  | 36,33 | 42,91 | 41,34 | 22,09 | 12,69 | 36,06 | 149   | 78,75 | 47,44  | 0,5056 | 0,6508 | 0,2494 | 0,7638 | 0,9889 | 0,9373 | 0,5221 | 0,2897 | 0,8399 | 3,32   | 1,784  | 1,143  |
| AT5G02550 |                                                                          |                                                                                                                                                                                                                                                                                                                                                                                                                                                                                                                                                                 | -1,334 | 0,00106  | 0,07193 | 21,25  | 26,89  | 3,79   | 47,56 | 41,81 | 32,73 | 14,36 | 8,077 | 7,888 | 20,14 | 9,402 | 19,54  | 2,607  | 3,356  | 0,4502 | 5,156  | 4,968  | 3,826  | 1,75   | 0,9507 | 0,9474 | 2,313  | 1,099  | 2,427  |
| AT4G04490 | cysteine-rich RLK (RECEPTOR-like protein kinase) 36                      | Encodes_a_cysteine-rich_receptor-like_protein_kinase                                                                                                                                                                                                                                                                                                                                                                                                                                                                                                            | 1,583  | 0,0011   | 0,0741  | 100,2  | 59,93  | 41,15  | 27,74 | 25,31 | 41,34 | 76,2  | 25,38 | 55,22 | 186,6 | 42,31 | 50,23  | 3,14   | 1,91   | 1,248  | 0,7682 | 0,7681 | 1,235  | 2,373  | 0,7632 | 1,694  | 5,476  | 1,263  | 1,594  |
| AT4G27140 | seed storage albumin 1                                                   |                                                                                                                                                                                                                                                                                                                                                                                                                                                                                                                                                                 | -3,441 | 0,00111  | 0,07434 | 15,79  | 264,3  | 144    | 6,606 | 7,702 | 3,445 | 85,04 | 62,31 | 29,3  | 0     | 0     | 1,395  | 1,391  | 23,69  | 12,29  | 0,5144 | 0,6574 | 0,2893 | 7,446  | 5,268  | 2,528  | 0      | 0      | 0,1245 |
| AT5G12340 |                                                                          |                                                                                                                                                                                                                                                                                                                                                                                                                                                                                                                                                                 | -1,304 | 0,00117  | 0,07683 | 61,33  | 145,2  | 107,2  | 101,1 | 148,5 | 56,84 | 104,9 | 24,23 | 30,42 | 71,16 | 27,03 | 26,51  | 5,731  | 13,8   | 9,699  | 8,345  | 13,44  | 5,062  | 9,741  | 2,172  | 2,783  | 6,226  | 2,406  | 2,509  |
| AT5G47850 | CRINKLY4 related 4                                                       |                                                                                                                                                                                                                                                                                                                                                                                                                                                                                                                                                                 | 1,359  | 0,0013   | 0,08238 | 4,858  | 10,76  | 29,24  | 23,12 | 14,3  | 18,95 | 16,57 | 23,08 | 70,99 | 76,53 | 36,43 | 33,49  | 0,1263 | 0,2846 | 0,7363 | 0,5313 | 0,3603 | 0,4696 | 0,4281 | 0,5759 | 1,808  | 1,864  | 0,9025 | 0,8822 |
| AT5G01550 | lectin receptor kinase a4.1                                              | Encodes_LecRKAA4.2_a_member_of_the_lectin_receptor_kinase_subfamily_A4_LecRKAA4.1_AT5G01540_LecRKAA4.2_AT5G01550_LecRKAA4.3_AT5G01560_Together_with_other_members                                                                                                                                                                                                                                                                                                                                                                                               |        |          |         |        |        |        |       |       |       |       |       |       |       |       |        |        |        |        |        |        |        |        |        |        |        |        |        |

|           |                                                                                        |                                                                                                                                                                                                                                                                                                                                                                                                                                                                            |        |         |         |       |        |        |       |       |       |       |        |        |        |       |       |        |        |        |        |        |        |        |        |        |        |        |        |   |
|-----------|----------------------------------------------------------------------------------------|----------------------------------------------------------------------------------------------------------------------------------------------------------------------------------------------------------------------------------------------------------------------------------------------------------------------------------------------------------------------------------------------------------------------------------------------------------------------------|--------|---------|---------|-------|--------|--------|-------|-------|-------|-------|--------|--------|--------|-------|-------|--------|--------|--------|--------|--------|--------|--------|--------|--------|--------|--------|--------|---|
| AT1G16420 | metacaspase 8                                                                          | Encodes_a_metacaspase_(cysteine-type_endopeptidase)_that_is_involved_in_promoting_programmed_cell_death_in_response_to_hydrogen_peroxide_(H2O2)_UV_light_and_methyl_viologen_(MV)_Transcript_levels_rise_in_response_to_UV-C_H2O2_and_MV_in_vitro_assays_demonstrate_that_this_enzyme_has_a_preference_for_cleaving_after_an_arginine_residue_and_it_has_a_pH_optimum_of_8.0.                                                                                              | 2,497  | 0,00179 | 0,1026  | 9,715 | 5,378  | 13     | 3,963 | 5,501 | 1,723 | 3,313 | 3,462  | 23,666 | 51,02  | 7,052 | 9,768 | 0,4499 | 0,2533 | 0,5826 | 0,1622 | 0,2467 | 0,076  | 0,1524 | 0,1538 | 1,073  | 2,212  | 0,311  | 0,4581 |   |
| AT3G59710 | NAD(P)-binding Rossmann-fold superfamily protein                                       |                                                                                                                                                                                                                                                                                                                                                                                                                                                                            | -1,082 | 0,00181 | 0,1026  | 81,37 | 29,96  | 72,02  | 62,09 | 103,4 | 56,84 | 45,28 | 36,92  | 20,28  | 25,51  | 31,73 | 47,44 | 4,229  | 1,584  | 3,624  | 2,852  | 5,207  | 2,815  | 2,338  | 1,841  | 1,032  | 1,241  | 1,571  | 2,497  |   |
| AT3G27270 | TRAM, LAG1 and CLN8 (TLC) lipid-sensing domain containing protein                      |                                                                                                                                                                                                                                                                                                                                                                                                                                                                            | -1,649 | 0,00184 | 0,1038  | 29,15 | 4,61   | 7,581  | 23,78 | 16,5  | 25,84 | 7,73  | 5,769  | 6,761  | 5,371  | 10,58 | 4,186 | 2,05   | 0,3298 | 0,5161 | 1,478  | 1,124  | 1,732  | 0,5401 | 0,3892 | 0,4655 | 0,3536 | 0,7084 | 0,2981 |   |
| AT2G47000 | ATP binding cassette subfamily B4                                                      | Multidrug_resistance_P-glycoprotein_(MDR/PGP)_subfamily_of_ABC_transporters_Functions_in_the_basipetal_redirection_of_auxin_from_the_root_tip_Exhibit_s_apolar_plasma_membrane_localization_in_the_root_cap_and_polar_localization_in_tissues_above.                                                                                                                                                                                                                       | 1,636  | 0,00192 | 0,1072  | 238   | 113,7  | 93,68  | 61,43 | 59,41 | 120,6 | 97,18 | 102,7  | 94,66  | 541,1  | 130,5 | 73,96 | 3,544  | 1,722  | 1,35   | 0,8082 | 0,8569 | 1,711  | 1,438  | 1,467  | 1,38   | 7,543  | 1,85   | 1,115  |   |
| AT2G04070 | MATE efflux family protein                                                             |                                                                                                                                                                                                                                                                                                                                                                                                                                                                            | 3,05   | 0,00195 | 0,108   | 326,7 | 6,922  | 4,332  | 4,624 | 12,1  | 60,27 | 5,522 | 5,769  | 6,761  | 570,7  | 39,96 | 18,14 | 12,47  | 0,2688 | 0,1601 | 0,156  | 0,4475 | 2,192  | 0,2094 | 0,2113 | 0,2527 | 20,39  | 1,453  | 0,7013 |   |
| AT5G03270 | lysine decarboxylase family protein                                                    |                                                                                                                                                                                                                                                                                                                                                                                                                                                                            | -1,653 | 0,00201 | 0,1087  | 13,97 | 43,79  | 24,91  | 17,84 | 34,11 | 18,95 | 16,57 | 16,15  | 11,27  | 6,714  | 7,052 | 8,372 | 1,254  | 4      | 2,165  | 1,415  | 2,966  | 1,621  | 1,478  | 1,392  | 0,9905 | 0,5644 | 0,603  | 0,7613 |   |
| AT4G23210 | cysteine-rich RLK (RECEPTOR-like protein kinase) 13                                    | Encodes_a_Cysteine-rich_receptor-like_kinase_(CRK13)_Overexpression_of_CRK13_leads_to_hypersensitive_response_cell_death_and_induces_defense_against_pathogens_by_causing_increased_accumulation_of_salicylic_acid.                                                                                                                                                                                                                                                        | 1,566  | 0,00202 | 0,1087  | 20,31 | 25,96  | 29,38  | 11,3  | 4,742 | 7,82  | 40,24 | 35,89  | 46,88  | 31,85  | 20,85 | 21,17 | 0,5635 | 0,7327 | 0,7892 | 0,2771 | 0,1274 | 0,2068 | 1,109  | 0,9552 | 1,273  | 0,8273 | 0,5509 | 0,5948 |   |
| AT4G24040 | trehalase 1                                                                            | Encodes_a_trehalase_member_of_Glycoside_Hydrolase_Family_37.                                                                                                                                                                                                                                                                                                                                                                                                               | 1,141  | 0,00216 | 0,1109  | 58,9  | 80,67  | 92,59  | 36,99 | 26,41 | 27,56 | 162,3 | 169,6  | 170,2  | 106,1  | 47,01 | 50,23 | 1,725  | 2,404  | 2,626  | 0,9575 | 0,7492 | 0,7693 | 4,725  | 4,767  | 4,88   | 2,909  | 1,312  | 1,49   |   |
| AT5G18270 | Arabidopsis NAC domain containing protein 87                                           |                                                                                                                                                                                                                                                                                                                                                                                                                                                                            | 1,184  | 0,00232 | 0,1127  | 20,64 | 23,82  | 12,45  | 20,48 | 18,7  | 17,23 | 9,939 | 8,077  | 5,634  | 57,74  | 42,31 | 29,3  | 0,8387 | 0,9843 | 0,4898 | 0,7351 | 0,736  | 0,6669 | 0,4012 | 0,3148 | 0,2241 | 2,196  | 1,637  | 1,206  |   |
| AT4G12410 | SAUR-like auxin-responsive protein family                                              |                                                                                                                                                                                                                                                                                                                                                                                                                                                                            | -1,49  | 0,00235 | 0,1163  | 7,894 | 3,073  | 11,37  | 23,78 | 18,7  | 29,28 | 8,835 | 4,615  | 4,507  | 8,056  | 7,052 | 9,768 | 0,7702 | 0,305  | 1,074  | 2,05   | 1,768  | 2,723  | 0,8565 | 0,432  | 0,4305 | 0,7359 | 0,6553 | 0,9652 |   |
| AT3G57765 | U2.3; snRNA                                                                            | encodes_a_small_nuclear_RNA_which_is_a_part_of_small_nuclear_ribonucleolar_particle_(snRNP)_and_is_involved_in_RNA_processing_such_as_splicing_and_polyadenylation.                                                                                                                                                                                                                                                                                                        | -1,149 | 0,00242 | 0,1186  | 19,95 | 27,27  | 27,1   | 61,1  | 42,39 | 40,89 | 54,95 | 28,15  | 41,31  | 19,87  | 14,79 | 31,09 | 1,419  | 1,973  | 1,866  | 3,84   | 2,921  | 2,772  | 3,884  | 1,921  | 2,877  | 1,323  | 1,002  | 2,24   |   |
| AT3G13950 |                                                                                        |                                                                                                                                                                                                                                                                                                                                                                                                                                                                            | 1,803  | 0,00243 | 0,1186  | 27,32 | 15,37  | 15,16  | 15,85 | 15,4  | 10,34 | 26,5  | 18,46  | 29,3   | 106,1  | 18,8  | 23,72 | 1,982  | 1,134  | 1,065  | 1,016  | 1,082  | 0,7145 | 1,91   | 1,285  | 2,081  | 7,204  | 1,299  | 1,743  |   |
| AT3G29250 | NAD(P)-binding Rossmann-fold superfamily protein                                       |                                                                                                                                                                                                                                                                                                                                                                                                                                                                            | 1,764  | 0,00249 | 0,1206  | 39,47 | 43,02  | 49,28  | 5,285 | 13,2  | 8,613 | 41,97 | 18,46  | 16,9   | 53,71  | 18,8  | 18,14 | 2,5    | 2,773  | 3,022  | 0,2958 | 0,8101 | 0,5199 | 2,641  | 1,122  | 1,048  | 3,185  | 1,135  | 1,164  |   |
| AT4G24000 | cellulose synthase like G2                                                             | encodes_a_protein_similar_to_cellulose_synthase                                                                                                                                                                                                                                                                                                                                                                                                                            | 1,324  | 0,0026  | 0,1248  | 6,072 | 14,6   | 15,16  | 50,2  | 23,11 | 36,17 | 1,104 | 6,923  | 1,127  | 155,8  | 85,8  | 34,89 | 0,1545 | 0,3778 | 0,3735 | 1,129  | 0,5694 | 0,8771 | 0,0279 | 0,169  | 0,0281 | 3,71   | 2,079  | 0,8989 |   |
| AT4G04540 | cysteine-rich RLK (RECEPTOR-like protein kinase) 39                                    | Encodes_a_cysteine-rich_receptor-like_protein_kinase                                                                                                                                                                                                                                                                                                                                                                                                                       | 2,675  | 0,00262 | 0,125   | 5,228 | 12,92  | 1,18   | 2,735 | 8,373 | 1,946 | 4,716 | 2,481  | 18,87  | 68,28  | 16,1  | 2,958 | 0,1636 | 0,4114 | 0,0358 | 0,0756 | 0,2538 | 0,058  | 0,1466 | 0,0745 | 0,5782 | 2      | 0,4798 | 0,0938 |   |
| AT5G19100 | Eukaryotic aspartyl protease family protein                                            |                                                                                                                                                                                                                                                                                                                                                                                                                                                                            | -2,774 | 0,00262 | 0,125   | 17,61 | 84,51  | 39,53  | 6,606 | 18,7  | 3,445 | 33,13 | 13,85  | 15,78  | 1,343  | 1,175 | 1,395 | 0,9277 | 4,529  | 2,016  | 0,3075 | 0,9544 | 0,173  | 1,734  | 0,6999 | 0,8136 | 0,0662 | 0,059  | 0,0745 |   |
| AT6G35540 | HSP20-like chaperones superfamily protein                                              |                                                                                                                                                                                                                                                                                                                                                                                                                                                                            | -1,386 | 0,00271 | 0,1272  | 1,214 | 0      | 0      | 37,65 | 20,9  | 29,28 | 2,209 | 0      | 2,254  | 10,74  | 14,1  | 8,372 | 0,1161 | 0      | 0      | 3,181  | 1,936  | 2,668  | 0,2098 | 0      | 0,2109 | 0,9615 | 1,284  | 0,8107 |   |
| AT1G49310 |                                                                                        |                                                                                                                                                                                                                                                                                                                                                                                                                                                                            | 2,079  | 0,00275 | 0,1283  | 3,643 | 17,67  | 17,33  | 1,321 | 2,2   | 5,168 | 8,835 | 16,15  | 5,634  | 10,74  | 12,93 | 8,372 | 0,5311 | 2,621  | 2,445  | 0,1702 | 0,3107 | 0,7179 | 1,28   | 2,259  | 0,8041 | 1,466  | 1,795  | 1,236  |   |
| AT1G67810 | sulfur E2                                                                              | Encodes_a_protein_capable_of_stimulating_the_cysteine_desulfurase_activity_of_CpNifs_(AT1G08490)_in_vitro_SuF2:GFP_localizes_to_the_chloroplasts_where_it_is_likely_to_play_a_role_in_iron_sulfur_cluster_assembly_Transcript_levels_for_this_gene_are_high_in_the_pollen_relative_to_other_organisms_based_on_RT-PCR_analysis.                                                                                                                                            | 1,088  | 0,00296 | 0,1345  | 27,93 | 32,27  | 21,66  | 24,44 | 18,7  | 18,95 | 49,7  | 28,85  | 52,96  | 57,74  | 38,79 | 37,68 | 2,008  | 2,359  | 1,507  | 1,552  | 1,302  | 1,298  | 3,549  | 1,989  | 3,727  | 3,885  | 2,655  | 2,742  |   |
| AT1G28480 | Thioredoxin superfamily protein                                                        | Encodes_GRX480_a_member_of_the_glutaredoxin_family_that_regulates_protein_redox_state_GRX480_interacts_with_TGA_factors_and_suppresses_JA-responsive_PDF1.2_transcription_GRX480_transcription_is_SAI-inducible_and_requires NPR1_Maybe_involved_in_SA/JA_crosstalk.                                                                                                                                                                                                       | -1,165 | 0,003   | 0,135   | 71,04 | 36,88  | 62,27  | 124,2 | 151,8 | 49,95 | 48,59 | 6,923  | 21,41  | 63,11  | 24,68 | 58,61 | 7,336  | 3,874  | 6,225  | 11,33  | 15,19  | 4,915  | 4,985  | 0,6859 | 2,164  | 6,101  | 2,427  | 6,129  |   |
| AT1G66390 | myb domain protein 90                                                                  | production_of_anthocyanin_pigment_2_protein_(PAP2)                                                                                                                                                                                                                                                                                                                                                                                                                         | 3,74   | 0,00305 | 0,1367  | 0     | 0,7683 | 0,5415 | 0     | 1,1   | 0     | 0     | 0      | 0      | 10,74  | 8,227 | 0     | 0      | 0,0491 | 0,0329 | 0      | 0,067  | 0      | 0      | 0      | 0      | 0      | 0,6319 | 0,4923 | 0 |
| AT3G48240 | Ocoticoseptide/Phox/Bem1p family protein                                               |                                                                                                                                                                                                                                                                                                                                                                                                                                                                            | -2,131 | 0,00358 | 0,1506  | 80,76 | 3,073  | 7,581  | 8,587 | 9,902 | 12,06 | 3,313 | 2,308  | 4,507  | 2,685  | 3,526 | 0     | 5,064  | 0,196  | 0,4602 | 0,4758 | 0,6014 | 0,7205 | 0,2064 | 0,1388 | 0,2767 | 0,1577 | 0,2106 | 0      |   |
| AT2G12930 | transposable element gene                                                              |                                                                                                                                                                                                                                                                                                                                                                                                                                                                            | -2,199 | 0,0037  | 0,153   | 1,84  | 9,135  | 6,157  | 11,56 | 11,18 | 8,819 | 10,09 | 1,05   | 11,21  | 1,893  | 0     | 5,721 | 0,0186 | 0,0939 | 0,0602 | 0,1032 | 0,1094 | 0,0849 | 0,1014 | 0,0102 | 0,1109 | 0,0179 | 0      | 0,0586 |   |
| AT1G61810 | beta-glucosidase 45                                                                    |                                                                                                                                                                                                                                                                                                                                                                                                                                                                            | 1,58   | 0,00398 | 0,161   | 4,858 | 49,94  | 30,86  | 8,581 | 12,1  | 6,89  | 5,522 | 12,7   | 6,761  | 38,93  | 11,75 | 33,49 | 0,2343 | 2,451  | 1,441  | 0,3657 | 0,5655 | 0,3167 | 0,2647 | 0,588  | 0,3193 | 1,758  | 0,54   | 1,636  |   |
| AT4G00700 | Ca2 calcium/lipid-binding plant phosphoribosyltransferase family protein               |                                                                                                                                                                                                                                                                                                                                                                                                                                                                            | 1,378  | 0,00422 | 0,1678  | 63,76 | 73,76  | 30,86  | 12,55 | 37,41 | 25,84 | 65,16 | 15     | 30,42  | 108,8  | 52,89 | 32,09 | 1,17   | 1,377  | 0,5485 | 0,2036 | 0,6651 | 0,452  | 1,188  | 0,2642 | 0,5468 | 1,869  | 0,9246 | 0,5967 |   |
| AT3G63380 | ATPase E1-E2 type family protein / haloacid dehalogenase-like hydrolase family protein |                                                                                                                                                                                                                                                                                                                                                                                                                                                                            | 1,865  | 0,00431 | 0,1698  | 32,79 | 63,77  | 62,81  | 17,84 | 9,902 | 3,445 | 77,3  | 45     | 69,86  | 81,91  | 28,21 | 11,16 | 0,5417 | 1,072  | 1,005  | 0,2604 | 0,1585 | 0,0542 | 1,269  | 0,7133 | 1,13   | 1,267  | 0,4438 | 0,1868 |   |
| AT1G46480 | WUSCHEL related homeobox 4                                                             | Encodes_a_WUSCHEL-related_homeobox_gene_family_member_with_65_amino_acids_in_its_homeodomain_Proteins_in_this_family_contain_a_sequence_of_eight_residues_(TLPFPMH)_downstream_of_the_homeodomain_called_the_WUS_box_This_protein_also_contains_an_acidic_domain_approximately_10_residues_upstream_of_the_WUS_box_Part_of_the_TDIF-TDR-WOX4_signaling_pathway_that_plays_a_crucial_role_in_the_maintenance_of_the_vascular_meristem_organization_during_secondary_growth. | -1,061 | 0,00465 | 0,1769  | 20,64 | 39,95  | 33,03  | 44,26 | 49,51 | 44,79 | 22,09 | 31,15  | 27,04  | 18,8   | 15,28 | 32,09 | 1,183  | 2,329  | 1,833  | 2,241  | 2,749  | 2,446  | 1,258  | 1,713  | 1,517  | 1,009  | 0,834  | 1,863  |   |
| AT2G31910 | cation/H+ exchanger 21                                                                 | member_of_Putative_Na+/H+_antiporter_family                                                                                                                                                                                                                                                                                                                                                                                                                                | -1,848 | 0,00499 | 0,1837  | 12,14 | 3,842  | 4,873  | 13,21 | 14,3  | 20,67 | 9,939 | 6,923  | 12,4   | 4,028  | 8,227 | 0     | 0,3011 | 0,0969 | 0,117  | 0,2894 | 0,3435 | 0,4883 | 0,2448 | 0,1647 | 0,3008 | 0,0935 | 0,1943 | 0      |   |
| AT1G43910 | P-loop containing nucleoside triphosphate hydrolases superfamily protein               |                                                                                                                                                                                                                                                                                                                                                                                                                                                                            | 1,597  | 0,00518 | 0,1876  | 73,47 | 70,68  | 31,95  | 9,909 | 35,21 | 18,95 | 35,34 | 11,54  | 20,28  | 126,2  | 25,86 | 40,47 | 2,803  | 2,743  | 1,18   | 0,334  | 1,301  | 0,6888 | 1,34   | 0,4223 | 0,7575 | 4,508  | 0,9394 | 1,563  |   |
| ATM000980 | Ribosomal protein S12/S23 family protein                                               | ribosomal_protein_L2                                                                                                                                                                                                                                                                                                                                                                                                                                                       | -1,11  | 0,00525 | 0,1883  | 47,75 | 20,55  | 52,78  | 50,96 | 49,33 | 40,45 | 31,52 | 18,43  | 29,68  | 24,13  | 10,81 | 31,03 | 7,826  | 3,427  | 8,375  | 7,38   | 7,832  | 6,317  | 5,133  | 2,898  | 4,763  | 3,702  | 1,688  | 5,151  |   |
| AT3G62920 |                                                                                        |                                                                                                                                                                                                                                                                                                                                                                                                                                                                            | -1,016 | 0,00545 | 0,192   | 41,29 | 37,65  | 32,49  | 42,94 | 45,11 | 43,06 | 39,76 | 38,08  | 31,55  | 18,8   | 29,38 | 15,35 | 6,091  | 5,649  | 4,64   | 5,596  | 6,445  | 6,053  | 5,827  | 5,389  | 4,556  | 2,596  | 4,128  | 2,293  |   |
| AT4G37370 | cytochrome P450, family 81, subfamily D, polypeptide 8                                 | member_of_CYP81D                                                                                                                                                                                                                                                                                                                                                                                                                                                           | 1,198  | 0,00632 | 0,2078  | 313,3 | 106    | 78,52  | 201,5 | 90,22 | 163,6 | 94,97 | 72,69  | 64,23  | 699,6  | 193,9 | 149,3 | 11,67  | 4,018  | 2,832  | 6,632  | 3,256  | 5,81   | 3,516  | 2,598  | 2,343  | 24,4   | 6,881  | 5,633  |   |
| AT2G26750 | alpha/beta-Hydrolases superfamily protein                                              |                                                                                                                                                                                                                                                                                                                                                                                                                                                                            | -2,606 | 0,00639 | 0,2093  | 4,979 | 1,79   | 5,637  | 3,805 | 6,271 | 7,769 | 1,391 | 0,1385 | 2,682  | 0,1746 | 1,457 | 1,73  | 0,2952 | 0,108  | 0,3235 | 0,1993 | 0,3601 | 0,4389 | 0,082  | 0,0079 | 0,1557 | 0,0097 | 0,0823 | 0,1039 |   |
| AT1G57630 | Toll-Interleukin-Resistance (TIR) domain family protein                                |                                                                                                                                                                                                                                                                                                                                                                                                                                                                            | 1,464  | 0,00685 | 0,2191  | 32,18 | 42,26  | 40,07  | 22,46 | 23,11 | 15,5  | 49,7  | 24,23  | 60,85  | 115,5  | 37,61 | 18,14 | 3,842  | 5,132  | 4,631  | 2,369  | 2,672  | 1,764  | 5,894  | 2,775  | 7,111  | 12,91  | 4,276  | 2,193  |   |
| AT3G10320 | glycosyltransferase family 61 protein                                                  |                                                                                                                                                                                                                                                                                                                                                                                                                                                                            | 1,397  | 0,00696 | 0,222</ |       |        |        |       |       |       |       |        |        |        |       |       |        |        |        |        |        |        |        |        |        |        |        |        |   |

|           |                                                         |                                                                                                                                                                                                                                |        |         |        |        |       |       |       |       |       |       |       |       |       |       |       |        |        |        |        |        |        |        |        |        |        |        |        |
|-----------|---------------------------------------------------------|--------------------------------------------------------------------------------------------------------------------------------------------------------------------------------------------------------------------------------|--------|---------|--------|--------|-------|-------|-------|-------|-------|-------|-------|-------|-------|-------|-------|--------|--------|--------|--------|--------|--------|--------|--------|--------|--------|--------|--------|
| AT4G23200 | cysteine-rich RLK (RECEPTOR-like protein kinase) 12     | Encodes_a_cysteine-rich_receptor-like_protein_kinase                                                                                                                                                                           | 1,082  | 0,00742 | 0,2287 | 27,32  | 54,55 | 76,35 | 21,8  | 25,31 | 24,12 | 90,56 | 81,92 | 171,3 | 63,11 | 62,29 | 23,72 | 0,8695 | 1,766  | 2,352  | 0,6129 | 0,78   | 0,7313 | 2,863  | 2,501  | 5,336  | 1,88   | 1,888  | 0,7645 |
| AT5G51440 | HSP20-like chaperones superfamily protein               |                                                                                                                                                                                                                                | 1,664  | 0,00747 | 0,2292 | 59,51  | 7,683 | 8,664 | 8,587 | 9,902 | 20,67 | 5,522 | 6,923 | 13,52 | 81,91 | 14,1  | 23,72 | 4,051  | 0,5321 | 0,571  | 0,5166 | 0,653  | 1,341  | 0,3735 | 0,4522 | 0,9013 | 5,221  | 0,9145 | 1,636  |
| AT5G38120 | AMP-dependent synthetase and ligase family protein      |                                                                                                                                                                                                                                | -1,052 | 0,00781 | 0,2366 | 191,3  | 607   | 337,9 | 32,37 | 42,91 | 31,01 | 123,7 | 227,3 | 70,99 | 14,77 | 15,28 | 20,93 | 6,854  | 22,13  | 11,72  | 1,025  | 1,489  | 1,059  | 4,404  | 7,815  | 2,49   | 0,4955 | 0,5214 | 0,7596 |
| AT2G30750 | cytochrome P450, family 71, subfamily A, polypeptide 12 | putative_cytochrome_P450                                                                                                                                                                                                       | 2,619  | 0,00834 | 0,2451 | 3,036  | 27,66 | 4,873 | 5,285 | 6,601 | 3,445 | 4,417 | 16,15 | 2,254 | 89,96 | 1,175 | 6,977 | 0,1116 | 1,034  | 0,1734 | 0,1716 | 0,235  | 0,1206 | 0,1613 | 0,5695 | 0,0811 | 3,095  | 0,0411 | 0,2597 |
| AT1G30370 | alpha/beta-Hydrolases superfamily protein               |                                                                                                                                                                                                                                | 1,672  | 0,00867 | 0,2513 | 1,214  | 4,61  | 5,956 | 6,606 | 2,2   | 3,445 | 1,104 | 8,077 | 28,17 | 20,14 | 14,1  | 8,372 | 0,0473 | 0,1827 | 0,2247 | 0,2274 | 0,0831 | 0,1279 | 0,0428 | 0,3019 | 1,075  | 0,7347 | 0,5234 | 0,3304 |
| AT1G11340 | S-locus lectin protein kinase family protein            |                                                                                                                                                                                                                                | 1,535  | 0,0091  | 0,258  | 26,11  | 54,55 | 54,15 | 7,266 | 4,401 | 3,445 | 61,84 | 60    | 87,89 | 20,14 | 9,402 | 18,14 | 0,5978 | 1,271  | 1,2    | 0,147  | 0,0976 | 0,0752 | 1,407  | 1,318  | 1,97   | 0,4317 | 0,205  | 0,4206 |
| AT1G15405 | other RNA                                               | Unknown_gene                                                                                                                                                                                                                   | -1,12  | 0,0097  | 0,2698 | 24,9   | 10,76 | 14,62 | 30,39 | 31,91 | 29,28 | 43,07 | 17,31 | 33,81 | 8,056 | 14,1  | 19,54 | 5,282  | 2,322  | 3,003  | 5,697  | 6,557  | 5,921  | 9,08   | 3,523  | 7,022  | 1,6    | 2,85   | 4,198  |
| AT3G28740 | Cytochrome P450 superfamily protein                     | Encodes_a_member_of_the_cytochrome_p450_family_Expression_is_upregulated_in_response_to_cis-jasmonate_treatment_Overexpression_induces_synthesis_of_volatil_e_compounds_that_affect_chemical_ecology_and_insect_interaction_s. | 2,19   | 0,00974 | 0,2701 | 0,6072 | 14,6  | 14,08 | 4,624 | 1,1   | 0     | 3,313 | 1,154 | 0     | 18,8  | 3,526 | 11,16 | 0,0236 | 0,5761 | 0,5287 | 0,1585 | 0,0413 | 0      | 0,1277 | 0,043  | 0      | 0,6827 | 0,1303 | 0,4386 |
| AT5G06800 | myb-like HTH transcriptional regulator family protein   |                                                                                                                                                                                                                                | 1,343  | 0,00999 | 0,2743 | 27,93  | 17,67 | 41,15 | 4,624 | 11    | 12,06 | 59,64 | 35,77 | 40,57 | 22,83 | 25,86 | 16,74 | 1,278  | 0,8225 | 1,823  | 0,1869 | 0,4876 | 0,5258 | 2,711  | 1,57   | 1,817  | 0,9778 | 1,127  | 0,776  |
