# Supplementary material
Source: PubMed Central journal article supplement (PMC5047071)
Supplement: supp_pp.16.00183_PP2016-00183R2_Supplemental_Materialdata4.pdf [file supp_pp.16.00183_PP2016-00183R2_Supplemental_Materialdata4.pdf]

|           |                                                       |                                                                                                                                                                                                                         |        |          |        |       |        |        |       |       |        |        |       |       |       |       |        |        |        |        |        |        |        |        |        |        |        |        |         |
|-----------|-------------------------------------------------------|-------------------------------------------------------------------------------------------------------------------------------------------------------------------------------------------------------------------------|--------|----------|--------|-------|--------|--------|-------|-------|--------|--------|-------|-------|-------|-------|--------|--------|--------|--------|--------|--------|--------|--------|--------|--------|--------|--------|---------|
| AT4G38590 | beta-galactosidase 14                                 | putative_beta-galactosidase_(BGAL14_gene)                                                                                                                                                                               | -1,95  | 0,005079 | 0,3134 | 8,051 | 24,97  | 14,65  | 6,231 | 3,606 | 5,546  | 12,84  | 7,213 | 3,974 | 1,751 | 1,034 | 0,9493 | 0,139  | 0,4226 | 0,2495 | 0,1046 | 0,061  | 0,0922 | 0,2189 | 0,1217 | 0,0673 | 0,0296 | 0,0175 | 0,01578 |
| AT5G16970 | alkenal reductase                                     | encodes_a_2-alkenal_reductase_(EC_1.3.1.74),_plays_a_key_role_in_the_detoxification_of_reactive_carbonyls                                                                                                               | 1,084  | 0,005215 | 0,3164 | 30,19 | 43,02  | 67,85  | 9,367 | 9,675 | 15,82  | 62,17  | 75,91 | 53,87 | 29,04 | 34,13 | 13,38  | 1,339  | 1,871  | 2,968  | 0,4041 | 0,4208 | 0,6756 | 2,722  | 3,291  | 2,342  | 1,261  | 1,485  | 0,5712  |
| AT1G71890 | Major facilitator superfamily protein                 | Encodes_a_sucrose_transporter_that_is_expressed_in_the_endosperm._Mutants_have_delayed_accumulation_of_fatty_acids_and_embryo_maturation.                                                                               | -1,778 | 0,005836 | 0,3328 | 3,019 | 2,995  | 6,411  | 8,308 | 3,606 | 7,922  | 6,421  | 2,705 | 3,974 | 1,751 | 3,103 | 0,9493 | 0,0917 | 0,0892 | 0,192  | 0,2453 | 0,1073 | 0,2316 | 0,1925 | 0,0803 | 0,1183 | 0,052  | 0,0924 | 0,02775 |
| AT2G02061 | Nucleotide-diphospho-sugar transferase family protein |                                                                                                                                                                                                                         | 1,069  | 0,00585  | 0,3328 | 15,1  | 23,96  | 12,82  | 8,308 | 3,606 | 11,09  | 19,98  | 10,82 | 25,83 | 16,63 | 19,65 | 15,19  | 0,674  | 1,049  | 0,5645 | 0,3607 | 0,1578 | 0,4767 | 0,8804 | 0,4722 | 1,13   | 0,7268 | 0,8604 | 0,6529  |
| AT1G18000 | Major facilitator superfamily protein                 |                                                                                                                                                                                                                         | 1,19   | 0,006171 | 0,3435 | 16,09 | 12,59  | 47,02  | 16,78 | 49,34 | 9,538  | 59,15  | 37,67 | 29,15 | 47,09 | 76,06 | 44,41  | 0,5225 | 0,4007 | 1,506  | 0,5299 | 1,571  | 0,2982 | 1,896  | 1,196  | 0,9278 | 1,496  | 2,422  | 1,388   |
| AT5G11410 | Protein kinase superfamily protein                    |                                                                                                                                                                                                                         | 1,545  | 0,006612 | 0,3524 | 24,15 | 30,95  | 31,14  | 2,077 | 4,808 | 1,584  | 33,53  | 27,05 | 17,88 | 6,128 | 9,309 | 8,543  | 1,309  | 1,644  | 1,664  | 0,1094 | 0,2554 | 0,0827 | 1,794  | 1,433  | 0,9498 | 0,325  | 0,4946 | 0,4457  |
| ATMG00410 | ATPase subunit 6-1                                    | ATPase_subunit_6                                                                                                                                                                                                        | 1,079  | 0,006627 | 0,3524 | 49,28 | 72,58  | 46,1   | 3,894 | 22,75 | 14,02  | 61,82  | 61,59 | 93,42 | 37,92 | 20,85 | 27,87  | 2,044  | 2,95   | 1,885  | 0,157  | 0,925  | 0,5598 | 2,531  | 2,497  | 3,797  | 1,539  | 0,8479 | 1,113   |
| AT5G27220 | Frigida-like protein                                  |                                                                                                                                                                                                                         | 1,484  | 0,009174 | 0,4082 | 16,1  | 5,991  | 11,91  | 4,154 | 3,606 | 0,7922 | 14,98  | 5,41  | 21,86 | 7,004 | 8,274 | 7,594  | 0,2488 | 0,0907 | 0,1814 | 0,0624 | 0,0546 | 0,0118 | 0,2285 | 0,0817 | 0,331  | 0,1059 | 0,1253 | 0,113   |
| AT1G19415 | transposable element gene                             |                                                                                                                                                                                                                         | -2,145 | 0,009452 | 0,4123 | 5,032 | 3,994  | 0,9159 | 2,077 | 9,615 | 6,338  | 0,7135 | 5,41  | 3,974 | 2,626 | 0     | 0,9493 | 0,2284 | 0,1777 | 0,041  | 0,0917 | 0,4278 | 0,2769 | 0,032  | 0,24   | 0,1768 | 0,1167 | 0      | 0,04148 |
| AT2G48121 |                                                       |                                                                                                                                                                                                                         | 1,459  | 0,009511 | 0,4123 | 9,168 | 9,116  | 5,797  | 1,246 | 9,952 | 2,725  | 8,526  | 7,709 | 3,12  | 13,97 | 8,564 | 11,17  | 1,237  | 1,206  | 0,7713 | 0,1635 | 1,316  | 0,354  | 1,136  | 1,017  | 0,4126 | 1,845  | 1,133  | 1,452   |
| AT3G19040 | histone acetyltransferase of the TAFII250 family 2    | Encodes_a_protein_similar_to_TATA-binding_protein-associated_factor_TAF1_(a.k.a._TAFII250)_with_histone_acetyltransferase_activity._It_is_required_in_integrating_light_signals_to_regulate_gene_expression_and_growth. | 1,093  | 0,009669 | 0,4139 | 13,08 | 12,98  | 16,49  | 6,231 | 4,808 | 5,546  | 16,41  | 19,84 | 11,92 | 13,13 | 11,38 | 11,39  | 0,1337 | 0,13   | 0,1661 | 0,0619 | 0,0482 | 0,0546 | 0,1655 | 0,1981 | 0,1194 | 0,1313 | 0,114  | 0,1121  |
| AT3G55210 | NAC domain containing protein 63                      |                                                                                                                                                                                                                         | 1,856  | 0,009998 | 0,4221 | 0     | 0,9984 | 0      | 1,039 | 1,202 | 1,584  | 2,14   | 0     | 0     | 5,253 | 3,103 | 6,645  | 0      | 0,0636 | 0      | 0,0656 | 0,0766 | 0,0991 | 0,1373 | 0      | 0      | 0,334  | 0,1977 | 0,4158  |
